**Title: The *Ceratodon purpureus* genome uncovers structurally complex, gene rich sex chromosomes**

**Authors:** Sarah B. Carey<sup>1,§,‡</sup>, Jerry Jenkins<sup>2</sup>, John T. Lovell<sup>2</sup>, Florian Maumus<sup>3</sup>, Avinash Sreedasyam<sup>2</sup>, Adam C. Payton<sup>1,4</sup>, Shenqiang Shu<sup>5</sup>, George P. Tiley<sup>6</sup>, Noe Fernandez-Pozo<sup>7</sup>, Kerrie Barry<sup>5</sup>, Cindy Chen<sup>5</sup>, Mei Wang<sup>5</sup>, Anna Lipzen<sup>5</sup>, Chris Daum<sup>5</sup>, Christopher A. Sasaki<sup>8</sup>, Jordan C. McBreen<sup>1</sup>, Roth E. Conrad<sup>9</sup>, Leslie M. Kollar<sup>1</sup>, Sanna Olsson<sup>10</sup>, Sanna Huttunen<sup>11</sup>, Jacob B. Landis<sup>12</sup>, J. Gordon Burleigh<sup>1</sup>, Norman J. Wickett<sup>13</sup>, Matthew G. Johnson<sup>14</sup>, Stefan A. Rensing<sup>7</sup>, Jane Grimwood<sup>2,5</sup>, Jeremy Schmutz<sup>2,5</sup>, and Stuart F. McDaniel<sup>1,\*</sup>

**Affiliations:**

<sup>1</sup>Department of Biology, University of Florida, Gainesville, FL, USA

<sup>2</sup>Genome Sequencing Center, HudsonAlpha Institute for Biotechnology, Huntsville, AL, USA

<sup>3</sup>Université Paris-Saclay, INRAE, URGI, 78026, Versailles, France

<sup>4</sup>RAPiD Genomics, Gainesville, FL, USA

<sup>5</sup>US Department of Energy Joint Genome Institute, Lawrence Berkeley National Laboratory, Berkeley, CA, USA

<sup>6</sup>Department of Biology, Duke University, Durham, NC, USA

<sup>7</sup>Plant Cell Biology, University of Marburg, Marburg, Germany

<sup>8</sup>Department of Plant and Environmental Sciences, Clemson University, Clemson, SC, USA

<sup>9</sup>School of Biological Sciences, Georgia Institute of Technology, Atlanta, GA, USA

<sup>10</sup>Department of Forest Ecology and Genetics, INIA-CIFOR, Madrid, Spain

<sup>11</sup>Department of Biology & Biodiversity Unit, University of Turku, Finland

<sup>12</sup>School of Integrative Plant Science, Section of Plant Biology and the L.H. Bailey Hortorium, Cornell University, Ithaca, NY, USA

<sup>13</sup>Negaunee Institute for Plant Conservation Science and Action, Chicago Botanic Garden,  
Glencoe, IL, USA

<sup>14</sup>Department of Biological Sciences, Texas Tech University, Lubbock, TX, USA

<sup>§</sup>Current address: Department of Crop, Soil, and Environmental Sciences, Auburn University,  
Auburn, AL, USA

<sup>‡</sup>Current address: HudsonAlpha Institute for Biotechnology, Huntsville, AL, USA

<sup>\*</sup>Corresponding author: [stuartmcdaniel@ufl.edu](mailto:stuartmcdaniel@ufl.edu)

1 **Abstract: Non-recombining sex chromosomes, like the mammalian Y, often lose genes**  
2 **and accumulate transposable elements, a process termed degeneration<sup>1,2</sup>. The**  
3 **correlation between suppressed recombination and degeneration is clear in animal XY**  
4 **systems<sup>1,2</sup>, but the absence of recombination is confounded with other asymmetries**  
5 **between the X and Y. In contrast, UV sex chromosomes, like those found in bryophytes,**  
6 **experience symmetrical population genetic conditions<sup>3,4</sup>. Here we test for degeneration in**  
7 **the bryophyte UV sex chromosome system through genomic comparisons with new**  
8 **female and male chromosome-scale reference genomes of the moss *Ceratodon***  
9 ***purpureus*. We show that the moss sex chromosomes evolved over 300 million years ago**  
10 **and expanded via two chromosomal fusions. Although the sex chromosomes show**  
11 **signs of weaker purifying selection than autosomes, we find suppressed recombination**  
12 **alone is insufficient to drive gene loss on sex-specific chromosomes. Instead, the U and**  
13 **V sex chromosomes harbor thousands of broadly-expressed genes, including numerous**  
14 **key regulators of sexual development across land plants.**

15  
16 **Main text:** Sex chromosomes arise when an ordinary pair of autosomes gains the capacity to  
17 determine sex<sup>5</sup>. A defining characteristic of sex chromosomes is suppressed recombination in  
18 the heterogametic sex. It is widely believed this lack of meiotic recombination makes natural  
19 selection less effective, predisposing non-recombining chromosomes, like the mammalian Y, to  
20 degeneration and gene-loss<sup>1,2</sup>. However, although some non-recombining chromosomes rapidly  
21 degenerate, or are completely lost, the sex chromosomes in other groups remain homomorphic  
22 or expand<sup>1</sup>. This diversity of form and gene content suggests the role of suppressed  
23 recombination in the long-term trajectory of sex chromosome evolution must be modulated by  
24 other processes related to the life history of the organism. Identifying these important processes  
25 requires comparative analyses across multiple eukaryotic lineages.

26 Many organisms, including bryophytes, algae, and some fungi, have a haploid UV sex  
27 chromosome system, in which females inherit a non-recombining U and males inherit a non-  
28 recombining V<sup>3,4</sup>. The sex-specific transmission pattern of both chromosomes means factors  
29 that are confounded in XY or ZW systems, such as suppressed recombination, hemizygoty,  
30 and sex-limited inheritance, are independent on UV chromosomes. Many UV sex chromosome  
31 systems may be ancient<sup>4</sup>, providing ample time for degenerative processes to act. However, the  
32 structural complexity of sex chromosomes has precluded genomic analyses in UV systems.  
33 Here we evaluate the relative roles of gene gain and degeneration in shaping the evolution of  
34 the bryophyte UV sex chromosomes using new chromosome-scale female and male genomes  
35 of the moss, *Ceratodon purpureus*.

36  
37 **Results:** Ancestral-state reconstructions of dioecy suggest that sex chromosomes evolved early  
38 in the history of the extant mosses<sup>6</sup>. To reconstruct the evolutionary history of the bryophyte UV  
39 sex chromosomes, we assembled and annotated chromosome-scale genomes of the GG1  
40 (female) and R40 (male) *C. purpureus* isolates. Although the *C. purpureus* genome is relatively  
41 small, the sex chromosomes are large and have extensive repeat content, making them a  
42 challenge to assemble<sup>7</sup>, particularly with short-read technologies, which often do not span a  
43 whole repeat. We therefore used a combination of Illumina, Bacterial Artificial Chromosomes  
44 (BACs), PacBio, and Dovetail Hi-C (Supplementary Tables 1-4; Extended Data Fig. 1). The  
45 version 1.0 genome assembly of R40 comprises 358 Megabases (Mb) in 601 contigs (N50 1.4  
46 Mb), with 98.3% of the assembled sequence in the largest 13 pseudomolecules, corresponding  
47 to the 13 chromosomes in its karyotype<sup>8</sup>. The version 1.0 GG1 assembly is 349.5 Mb in 558  
48 contigs (N50 1.4 Mb), with 97.9% of assembled sequence in the largest 13 pseudomolecules.  
49 Using over 1.5 billion RNA-seq reads for each of the genome lines and additional *de novo*  
50 assemblies of other *C. purpureus* isolates (Supplementary Table 5), we annotated 31,482

51 genes on the R40 assembly and 30,425 on GG1 (BUSCO v3.0 of 69% using Embryophyte; 96.7  
52 and 96.4%, respectively using Eukaryote; values similar to the moss *Physcomitrium patens*<sup>9</sup>).

53 To examine the conservation of genome architecture, we performed synteny analyses  
54 between the two *C. purpureus* genomes and the *P. patens* genome. GG1 and R40 were  
55 collected from distant localities (Gross Gerungs, Austria and Rensselaer, New York, USA,  
56 respectively)<sup>10</sup>, and we found the assemblies had numerous structural differences (Fig. 1). In  
57 the self-synteny analysis we found clear homeologous chromosome pairs resulting from an  
58 ancient whole-genome duplication (Fig. 1, Extended Data Fig. 1), consistent with previous  
59 transcriptomic<sup>10,11</sup> and our own *Ks*-based analyses (Extended Data Fig. 1; Supplementary Table  
60 6). We also identified abundant synteny between the *C. purpureus* and *P. patens*  
61 chromosomes, which diverged over 200 million years ago (MYA)<sup>12</sup> (Fig. 1). This result  
62 demonstrates the ancestral karyotype of most extant mosses consisted of seven  
63 chromosomes<sup>12</sup>, which we refer to as Ancestral Elements A-G (Fig. 1), and suggests major  
64 parts of the gene content of moss chromosomes are stable over hundreds of millions of years,  
65 similar to the "Muller Elements" in *Drosophila*<sup>13</sup>. Curiously, we could not detect the homeologs of  
66 the *C. purpureus* chromosomes 5 and 9 using synteny, an observation we return to below.

67 The major exception to the long-term genomic stability observed in *C. purpureus* was the  
68 sex chromosomes, which also share no obviously syntenic regions with each other or the  
69 autosomes (Fig. 1). The sex chromosomes are ~30% of each genome (110.5 Mb on the R40 V,  
70 112.2 Mb on the GG1 U; Fig. 1), four times the size of the largest autosome. The size is largely  
71 attributable to an increase in transposable elements (TEs), which comprise 78.2% and 81.9% of  
72 the U and V, respectively, similar to the non-recombining Y or W sex chromosomes in other  
73 systems<sup>14</sup>, but far more than the *C. purpureus* autosomes (mean ( $\mu$ ): 46.4%; *Mann-Whitney U*  
74 *with Benjamini and Hochberg correction (MWU)*, autosomes to U or V  $P < 2 \times 10^{-16}$ ; Fig. 1). While  
75 some TEs have a homogeneous distribution across all chromosomes (e.g., *Copia*;  $\mu$ :  
76 autosomes=0.8%, U=1.3%, V=1.2%; *MWU*, all pairwise comparisons  $P > 0.09$ ), the U and V

77 chromosomes are enriched for very different classes of repeats compared to each other and the  
78 autosomes. For example, the U was enriched for hAT ( $\mu$ : autosomes=2.3%, U=10.1%, V=7.4%;  
79 *MWU*, all pairwise comparisons  $P < 1.5 \times 10^{-14}$ ) and the V was enriched in a previously  
80 undescribed superfamily of cut-and-paste DNA transposons, which we refer to as Lanisha  
81 elements ( $\mu$ : autosomes=1%, U=1.2%, V=5.8%; *MWU*, all pairwise comparisons  $P < 1 \times 10^{-4}$ ; Fig.  
82 1; Supplementary Fig. 2). The distribution of repeats in *C. purpureus* and the physical proximity  
83 of the autosomes inferred from the Hi-C contact map (Extended Data Fig. 1) together highlight  
84 the enigmatic isolation of the sex chromosomes in the nucleus<sup>15</sup>.

85 Unlike other non-recombining sex chromosomes, neither the U nor V show signs of  
86 major degeneration beyond the increased TE density. Sex-linked genes used on average one  
87 more codon than autosomes (ENC), less frequently use optimal codons (fop), have a loss of  
88 preferred GC bias in the third synonymous codon position (GC3s), and have a higher rate of  
89 protein evolution (dN/dS), all consistent with weaker selection (Fig. 2; *MWU*, autosomes to U or  
90 V  $P < 6 \times 10^{-6}$  for all metrics). Although, notably, the U and V-linked genes were not significantly  
91 different from one another (*MWU*, ENC  $P = 0.8$ ; fop  $P = 0.22$ ; GC3s  $P = 0.18$ ; dN/dS  $P = 0.73$ ),  
92 suggesting transmission through one sex or the other has no detectable effect on purifying  
93 selection. Consistent with this observation, the U and the V possess 3,450 and 3,411  
94 transcripts, respectively, representing ~12% of the *C. purpureus* gene content. This stands in  
95 stark contrast to the non-recombining mammalian Y chromosome, or even other UV systems,  
96 which typically contain an order of magnitude fewer genes, at most<sup>16-18</sup>. These observations  
97 indicate that although suppressed recombination decreases the efficacy of natural selection,  
98 alone it is insufficient to drive gene loss on non-recombining sex chromosomes<sup>19</sup>.

99 The lack of degeneration means that thousands of genes can be used to reconstruct a  
100 detailed history of gene gain on the *C. purpureus* UV sex chromosomes. Critically, the times to  
101 the most-recent common ancestor between orthologous genes on the U and V chromosomes  
102 allows us to estimate a minimum age for the sex chromosome system. To accomplish this, we

103 used a phylogenomic approach with stringent inclusion criteria. We built 744 gene trees, 402  
104 with U and V-linked homologs. We found most genes became sex-linked in the *C. purpureus*  
105 lineage, after the divergence from *Syntrichia princeps* ( $\mu Ks=0.16$ ; Fig. 3; Supplementary Table  
106 7). However, 13 U-V orthologous pairs diverged at the base of the Dicranidae ( $\mu Ks=0.85$ ), and  
107 three pairs diverged prior to the split between the two diverse clades Bryidae and Dicranidae ( $\mu$   
108  $Ks=1.64$ ). The most ancient U-V divergence (a Zinc finger Ran binding protein of unknown  
109 function) was prior to the split between *Buxbaumia aphylla* and the remaining Bryopsida, ~300  
110 MYA (based on previous fossil-calibrated, relaxed-clock analyses<sup>20</sup>;  $Ks=2.8$ ; Extended Data Fig.  
111 2), making the moss sex chromosomes among the oldest known to date across Eukarya.

112 A classic signature of gene capture on sex chromosomes is the presence of strata,  
113 where neighboring genes added in the same recombination suppression event have a similar  
114  $Ks$ <sup>21</sup>. However, on the *C. purpureus* sex chromosomes we found  $Ks$  was not associated with  
115 gene order (Fig. 3). Even genes with very low  $Ks$ , presumably from the most-recent  
116 recombination suppression event, were found across the entirety of the U or V, meaning gene-  
117 order was shuffled soon after the evolution of sex-linkage. To understand the mechanism by  
118 which the region of suppressed recombination acquires new genes, we combined inferences  
119 from phylogenomic analyses with the physical position of orthologs among the ancestral  
120 karyotypic elements. When we examined gene trees for the two most recent capture events, we  
121 found most homologs are from Ancestral Elements D and B (Supplementary Table 7) indicating  
122 the missing homeologous chromosomes to *C. purpureus* 5 and 9, respectively, had fused to the  
123 sex chromosomes (Fig. 3), but the scrambling of gene order had rendered them undetectable  
124 using synteny alone.

125 To extend this ancestral reconstruction to liverwort sex chromosomes, we examined  
126 gene trees of sex-linked genes in *M. polymorpha*<sup>17,22</sup>. Like in *C. purpureus*, we found no  
127 evidence of syntenic strata when we compared  $Ks$  between the U and V-linked orthologs  
128 (Supplementary Table 8). We also found evidence of four liverwort-specific capture events, with

129 the oldest diverging ~400 MYA, prior to the split of Marchantiidae and Pelliidae<sup>20</sup> (Fig. 3;  
130 Extended Data Fig. 2). Most sex-linked genes in *M. polymorpha* (Supplementary Table 8), like  
131 two of the oldest genes in *C. purpureus* (Supplementary Table 7) have homologs from moss  
132 Ancestral Element A, leading to the remarkable suggestion that this element played a key role in  
133 sex determination early in the history of both lineages, ~500 MYA.

134 A key factor explaining the retention of transcripts on non-recombining sex  
135 chromosomes is broad expression<sup>23,24</sup>, which in plants include the haploid phase. In  
136 transcriptomic data from multiple tissues we found more than 1,700 U and V-linked genes  
137 expressed (mean count  $\geq 1$ ) (Supplementary Tables 9-11), including essential components of  
138 the cytoskeleton (e.g., Tubulin) and DNA repair complexes (e.g., *RAD51*). In fact, based on an  
139 analysis of sex-biased gene expression, we found far more sex-specific sex-linked genes (i.e.,  
140 only on the U or V) than significant autosomal genes (mean count  $\geq 1$ , fold change  $\geq 2$ , adjusted  
141  $P \leq 0.05$ ), suggesting sex-linked loci contribute more to expression differences between the  
142 sexes than do autosomes (Extended Data Table 1). Furthermore, in contrast to data from gene-  
143 poor sex chromosome systems, we found nearly all the genes in the male and female co-  
144 expression modules, including the hubs, are sex-linked (Extended Data Fig. 3; Supplementary  
145 Table 12).

146 The sex-specific gene expression networks are enriched for proteins with known  
147 reproductive functions across green plant lineages. For example, the male GO and KEGG terms  
148 are enriched for microtubule-based processes, which play a role in sperm production in other  
149 systems<sup>25,26</sup> (Extended Data Fig. 3; Supplementary Tables 13-14). We also found both male  
150 and female co-expression modules are enriched for genes involved in circadian rhythm, like  
151 phytochrome, which are involved in flower development in *Arabidopsis thaliana*<sup>27</sup>. The male co-  
152 expression module also contained a V-specific *ABC1* gene orthologous to a V-linked copy in *M.*  
153 *polymorpha* (Extended Data Fig. 4), and genes in this family are involved with pollen



154 development in angiosperms<sup>28</sup>. The female co-expression module contains a U-specific *RWP-*  
155 *RK* TF orthologous to *M. polymorpha* *MpRKD*, which is a component of the egg development  
156 pathway in *M. polymorpha* and *A. thaliana* and mating-type loci in green algae<sup>16,29,30</sup> (Extended  
157 Data Fig. 4). The cis-acting sexual dimorphism switch *MpFGMYB*<sup>31</sup>, which promotes female  
158 development in *M. polymorpha* has orthologous U and V-linked copies in *C. purpureus*  
159 (Extended Data Fig. 4). Additionally, several other TFs or transcriptional regulators (TR) are  
160 found in the sex-specific co-expression modules (e.g., V-linked *R2R3-MYB*) or are only found  
161 on the U or V (e.g., *HD DDT*, *Med7*, and *SOH1*; Supplementary Table 15), together suggesting  
162 candidate regulators of sex-specific developmental processes are enriched on the *C. purpureus*  
163 UV sex chromosomes.

164

165 **Conclusions:** Our analyses challenge the idea that suppressed recombination and sex-limited  
166 inheritance are sufficient to drive sex chromosome degeneration. Clearly the lack of meiotic  
167 recombination both weakens purifying selection, resulting in decreased codon bias and  
168 increased protein evolution, and facilitates massive structural variation and highly-differentiated  
169 TE accumulation between the U and V. Like in other plants, haploid gene expression in *C.*  
170 *purpureus* apparently slows sex chromosome degeneration, even over millions of years of  
171 suppressed recombination<sup>23</sup>. However, unlike flowering plants, where hermaphroditism is the  
172 norm<sup>32</sup>, the antiquity of dioecy in bryophytes more closely mirrors the sexual systems in  
173 animals<sup>33,34</sup>. Thus, the gene rich *C. purpureus* sex chromosomes provide a powerful  
174 comparative tool for studying the long-term evolution of sex-limited gene regulatory networks  
175 that govern sexual differentiation.

176 **References:**

- 177 1. Charlesworth, B. & Charlesworth, D. The degeneration of Y chromosomes. *Philos. Trans.*  
178 *R. Soc. Lond. B Biol. Sci.* **355**, 1563–1572 (2000).
- 179 2. Bachtrog, D. Y-chromosome evolution: emerging insights into processes of Y-chromosome  
180 degeneration. *Nat. Rev. Genet.* **14**, 113–124 (2013).
- 181 3. Bachtrog, D. *et al.* Are all sex chromosomes created equal? *Trends Genet.* **27**, 350–357  
182 (2011).
- 183 4. Carey, S. B., Kollar, L. M. & McDaniel, S. F. Does degeneration or genetic conflict shape  
184 gene content on UV sex chromosomes? *EcoEvoRxiv* (2020) doi:10.32942/osf.io/hs6w3.
- 185 5. Bull, J. J. *Evolution of sex determining mechanisms*. (The Benjamin/Cummings Publishing  
186 Company, Inc., 1983).
- 187 6. McDaniel, S. F., Atwood, J. & Burleigh, J. G. Recurrent evolution of dioecy in bryophytes.  
188 *Evolution* **67**, 567–572 (2013).
- 189 7. McDaniel, S. F., Willis, J. H. & Shaw, A. J. A linkage map reveals a complex basis for  
190 segregation distortion in an interpopulation cross in the moss *Ceratodon purpureus*.  
191 *Genetics* **176**, 2489–2500 (2007).
- 192 8. Fritsch, R. Index to bryophyte chromosome counts. (1991).
- 193 9. Simão, F. A., Waterhouse, R. M., Ioannidis, P., Kriventseva, E. V. & Zdobnov, E. M.  
194 BUSCO: assessing genome assembly and annotation completeness with single-copy  
195 orthologs. *Bioinformatics* **31**, 3210–3212 (2015).
- 196 10. Szövényi, P. *et al.* De novo assembly and comparative analysis of the *Ceratodon*  
197 *purpureus* transcriptome. *Mol. Ecol. Resour.* **15**, 203–215 (2015).
- 198 11. One Thousand Plant Transcriptomes Initiative. One thousand plant transcriptomes and the  
199 phylogenomics of green plants. *Nature* **574**, 679–685 (2019).
- 200 12. Lang, D. *et al.* The *Physcomitrella patens* chromosome-scale assembly reveals moss  
201 genome structure and evolution. *Plant J.* **93**, 515–533 (2018).
- 202 13. Schaeffer, S. W. Muller ‘Elements’ in *Drosophila*: How the Search for the Genetic Basis for  
203 Speciation Led to the Birth of Comparative Genomics. *Genetics* **210**, 3–13 (2018).
- 204 14. Bergero, R. & Charlesworth, D. The evolution of restricted recombination in sex  
205 chromosomes. *Trends Ecol. Evol.* **24**, 94–102 (2009).
- 206 15. Montgomery, S. A. *et al.* Chromatin Organization in Early Land Plants Reveals an Ancestral  
207 Association between H3K27me3, Transposons, and Constitutive Heterochromatin. *Curr.*  
208 *Biol.* **30**, 573–588.e7 (2020).
- 209 16. Ferris, P. *et al.* Evolution of an expanded sex-determining locus in *Volvox*. *Science* **328**,  
210 351–354 (2010).
- 211 17. Bowman, J. L. *et al.* Insights into Land Plant Evolution Garnered from the *Marchantia*  
212 *polymorpha* Genome. *Cell* **171**, 287–304.e15 (2017).
- 213 18. Ahmed, S. *et al.* A haploid system of sex determination in the brown alga *Ectocarpus* sp.  
214 *Curr. Biol.* **24**, 1945–1957 (2014).
- 215 19. Immler, S. & Otto, S. P. The evolution of sex chromosomes in organisms with separate  
216 haploid sexes. *Evolution* **69**, 694–708 (2015).
- 217 20. Laenen, B. *et al.* Extant diversity of bryophytes emerged from successive post-Mesozoic  
218 diversification bursts. *Nat. Commun.* **5**, 5134 (2014).

- 219 21. Lahn, B. T. & Page, D. C. Four evolutionary strata on the human X chromosome. *Science*  
220 **286**, 964–967 (1999).
- 221 22. Materials and methods are available as supporting material on *Science* Online.
- 222 23. Chibalina, M. V. & Filatov, D. A. Plant Y chromosome degeneration is retarded by haploid  
223 purifying selection. *Curr. Biol.* **21**, 1475–1479 (2011).
- 224 24. Bellott, D. W. *et al.* Mammalian Y chromosomes retain widely expressed dosage-sensitive  
225 regulators. *Nature* **508**, 494–499 (2014).
- 226 25. Pazour, G. J., Dickert, B. L. & Witman, G. B. The DHC1b (DHC2) isoform of cytoplasmic  
227 dynein is required for flagellar assembly. *J. Cell Biol.* **144**, 473–481 (1999).
- 228 26. Koshimizu, S. *et al.* Physcomitrella MADS-box genes regulate water supply and sperm  
229 movement for fertilization. *Nat Plants* **4**, 36–45 (2018).
- 230 27. Endo, M., Nakamura, S., Araki, T., Mochizuki, N. & Nagatani, A. Phytochrome B in the  
231 mesophyll delays flowering by suppressing FLOWERING LOCUS T expression in  
232 *Arabidopsis* vascular bundles. *Plant Cell* **17**, 1941–1952 (2005).
- 233 28. Kuromori, T., Ito, T., Sugimoto, E. & Shinozaki, K. *Arabidopsis* mutant of AtABCG26, an  
234 ABC transporter gene, is defective in pollen maturation. *J. Plant Physiol.* **168**, 2001–2005  
235 (2011).
- 236 29. Rövekamp, M., Bowman, J. L. & Grossniklaus, U. *Marchantia* MpRKD Regulates the  
237 Gametophyte-Sporophyte Transition by Keeping Egg Cells Quiescent in the Absence of  
238 Fertilization. *Curr. Biol.* **26**, 1782–1789 (2016).
- 239 30. Tedeschi, F., Rizzo, P., Rutten, T., Altschmied, L. & Bäumlein, H. RWP- RK domain-  
240 containing transcription factors control cell differentiation during female gametophyte  
241 development in *Arabidopsis*. *New Phytol.* **213**, 1909–1924 (2017).
- 242 31. Hisanaga, T. *et al.* A cis-acting bidirectional transcription switch controls sexual dimorphism  
243 in the liverwort. *EMBO J.* **38**, (2019).
- 244 32. Renner, S. S. The relative and absolute frequencies of angiosperm sexual systems: dioecy,  
245 monoecy, gynodioecy, and an updated online database. *Am. J. Bot.* **101**, 1588–1596  
246 (2014).
- 247 33. Eppley, S. M. & Jesson, L. K. Moving to mate: the evolution of separate and combined  
248 sexes in multicellular organisms. *J. Evol. Biol.* **21**, 727–736 (2008).
- 249 34. Sasson, D. A. & Ryan, J. F. A reconstruction of sexual modes throughout animal evolution.  
250 *BMC Evol. Biol.* **17**, 242 (2017).
- 251 35. Norrell, T. E., Jones, K. S., Payton, A. C. & McDaniel, S. F. Meiotic sex ratio variation in  
252 natural populations of *Ceratodon purpureus* (Ditrichaceae). *Am. J. Bot.* **101**, 1572–1576  
253 (2014).
- 254 36. McDaniel, S. F. & Shaw, A. J. Selective sweeps and intercontinental migration in the  
255 cosmopolitan moss *Ceratodon purpureus* (Hedw.) Brid. *Mol. Ecol.* **14**, 1121–1132 (2005).
- 256 37. Xiao, C.-L. *et al.* MECAT: fast mapping, error correction, and de novo assembly for single-  
257 molecule sequencing reads. *Nat. Methods* **14**, 1072–1074 (2017).
- 258 38. Chin, C.-S. *et al.* Nonhybrid, finished microbial genome assemblies from long-read SMRT  
259 sequencing data. *Nat. Methods* **10**, 563–569 (2013).
- 260 39. Durand, N. C. *et al.* Juicer Provides a One-Click System for Analyzing Loop-Resolution Hi-  
261 C Experiments. *Cell Syst* **3**, 95–98 (2016).
- 262 40. Kent, W. J. BLAT—The BLAST-Like Alignment Tool. *Genome Res.* **12**, 656–664 (2002).

- 263 41. Li, H. Aligning sequence reads, clone sequences and assembly contigs with BWA-MEM.  
264 *arXiv [q-bio.GN]* (2013).
- 265 42. McKenna, A. *et al.* The Genome Analysis Toolkit: a MapReduce framework for analyzing  
266 next-generation DNA sequencing data. *Genome Res.* **20**, 1297–1303 (2010).
- 267 43. Wu, T. D., Reeder, J., Lawrence, M., Becker, G. & Brauer, M. J. GMAP and GSNAP for  
268 Genomic Sequence Alignment: Enhancements to Speed, Accuracy, and Functionality.  
269 *Methods Mol. Biol.* **1418**, 283–334 (2016).
- 270 44. Krumsiek, J., Arnold, R. & Rattei, T. Gepard: a rapid and sensitive tool for creating dotplots  
271 on genome scale. *Bioinformatics* **23**, 1026–1028 (2007).
- 272 45. Haas, B. J. *et al.* Improving the Arabidopsis genome annotation using maximal transcript  
273 alignment assemblies. *Nucleic Acids Res.* **31**, 5654–5666 (2003).
- 274 46. Lamesch, P. *et al.* The Arabidopsis Information Resource (TAIR): improved gene  
275 annotation and new tools. *Nucleic Acids Res.* **40**, D1202–10 (2012).
- 276 47. Schmutz, J. *et al.* Genome sequence of the palaeopolyploid soybean. *Nature* **463**, 178–183  
277 (2010).
- 278 48. Mamidi, S. *et al.* A genome resource for green millet *Setaria viridis* enables discovery of  
279 agronomically valuable loci. *Nat. Biotechnol.* **38**, 1203–1210 (2020).
- 280 49. Jaillon, O. *et al.* The grapevine genome sequence suggests ancestral hexaploidization in  
281 major angiosperm phyla. *Nature* **449**, 463–467 (2007).
- 282 50. Banks, J. A. *et al.* The Selaginella genome identifies genetic changes associated with the  
283 evolution of vascular plants. *Science* **332**, 960–963 (2011).
- 284 51. Merchant, S. S. *et al.* The Chlamydomonas genome reveals the evolution of key animal  
285 and plant functions. *Science* **318**, 245–250 (2007).
- 286 52. Smit, A. F. A., Hubble, R. & Green, P. RepeatMasker Open-4.0. 2013--2015. (2015).
- 287 53. Smit, A. F. A., Hubble, R. & Green, P. RepeatModeler Open-1.0. 2008--2015. *Seattle, USA:*  
288 *Institute for Systems Biology. Available from: <httpwww.repeatmasker.org>, Last Accessed*  
289 *May 1, 2018* (2015).
- 290 54. Salamov, A. A. & Solovyev, V. V. Ab initio gene finding in Drosophila genomic DNA.  
291 *Genome Res.* **10**, 516–522 (2000).
- 292 55. Slater, G. S. C. & Birney, E. Automated generation of heuristics for biological sequence  
293 comparison. *BMC Bioinformatics* **6**, 31 (2005).
- 294 56. Hoff, K. J., Lange, S., Lomsadze, A., Borodovsky, M. & Stanke, M. BRAKER1:  
295 Unsupervised RNA-Seq-Based Genome Annotation with GeneMark-ET and AUGUSTUS.  
296 *Bioinformatics* **32**, 767–769 (2016).
- 297 57. Lovell, J. T. *et al.* The genomic landscape of molecular responses to natural drought stress  
298 in *Panicum hallii*. *Nat. Commun.* **9**, 5213 (2018).
- 299 58. Zwaenepoel, A. & Van de Peer, Y. wgd—simple command line tools for the analysis of  
300 ancient whole-genome duplications. *Bioinformatics* **35**, 2153–2155 (2019).
- 301 59. Camacho, C. *et al.* BLAST+: architecture and applications. *BMC Bioinformatics* **10**, 421  
302 (2009).
- 303 60. Enright, A. J., Van Dongen, S. & Ouzounis, C. A. An efficient algorithm for large-scale  
304 detection of protein families. *Nucleic Acids Res.* **30**, 1575–1584 (2002).
- 305 61. Yang, Z. PAML 4: phylogenetic analysis by maximum likelihood. *Mol. Biol. Evol.* **24**, 1586–  
306 1591 (2007).

- 307 62. Goldman, N. & Yang, Z. A codon-based model of nucleotide substitution for protein-coding  
308 DNA sequences. *Mol. Biol. Evol.* **11**, 725–736 (1994).
- 309 63. Proost, S. *et al.* i-ADHoRe 3.0—fast and sensitive detection of genomic homology in  
310 extremely large data sets. *Nucleic Acids Res.* **40**, e11–e11 (2012).
- 311 64. Tiley, G. P., Barker, M. S. & Burleigh, J. G. Assessing the Performance of Ks Plots for  
312 Detecting Ancient Whole Genome Duplications. *Genome Biol. Evol.* **10**, 2882–2898 (2018).
- 313 65. Rensing, S. A. *et al.* An ancient genome duplication contributed to the abundance of  
314 metabolic genes in the moss *Physcomitrella patens*. *BMC Evol. Biol.* **7**, 130 (2007).
- 315 66. Flutre, T., Duprat, E., Feuillet, C. & Quesneville, H. Considering transposable element  
316 diversification in de novo annotation approaches. *PLoS One* **6**, e16526 (2011).
- 317 67. Quesneville, H. *et al.* Combined evidence annotation of transposable elements in genome  
318 sequences. *PLoS Comput. Biol.* **1**, (2005).
- 319 68. Benson, G. Tandem repeats finder: a program to analyze DNA sequences. *Nucleic Acids*  
320 *Res.* **27**, 573–580 (1999).
- 321 69. Hoede, C. *et al.* PASTEC: an automatic transposable element classification tool. *PLoS One*  
322 **9**, e91929 (2014).
- 323 70. Steinegger, M. *et al.* HH-suite3 for fast remote homology detection and deep protein  
324 annotation. *BMC Bioinformatics* **20**, 473 (2019).
- 325 71. Quinlan, A. R. & Hall, I. M. BEDTools: a flexible suite of utilities for comparing genomic  
326 features. *Bioinformatics* **26**, 841–842 (2010).
- 327 72. Team, R. C. R: a language and environment for statistical computing (version 3.5.  
328 3)[software]. (2019).
- 329 73. Gel, B. & Serra, E. karyoploteR: an R/Bioconductor package to plot customizable genomes  
330 displaying arbitrary data. *Bioinformatics* **33**, 3088–3090 (2017).
- 331 74. Benjamini, Y. & Hochberg, Y. Controlling the False Discovery Rate: A Practical and  
332 Powerful Approach to Multiple Testing. *J. R. Stat. Soc. Series B Stat. Methodol.* **57**, 289–  
333 300 (1995).
- 334 75. McKnight, P. E. & Najab, J. Mann-Whitney U Test. *The Corsini encyclopedia of psychology*  
335 1–1 (2010).
- 336 76. Lang, D. *et al.* Genome-wide phylogenetic comparative analysis of plant transcriptional  
337 regulation: a timeline of loss, gain, expansion, and correlation with complexity. *Genome*  
338 *Biol. Evol.* **2**, 488–503 (2010).
- 339 77. Wilhelmsson, P. K. I., Mühlich, C., Ullrich, K. K. & Rensing, S. A. Comprehensive Genome-  
340 Wide Classification Reveals That Many Plant-Specific Transcription Factors Evolved in  
341 Streptophyte Algae. *Genome Biol. Evol.* **9**, 3384–3397 (2017).
- 342 78. Bolger, A. M., Lohse, M. & Usadel, B. Trimmomatic: a flexible trimmer for Illumina  
343 sequence data. *Bioinformatics* **30**, 2114–2120 (2014).
- 344 79. Kim, D., Langmead, B. & Salzberg, S. L. HISAT: a fast spliced aligner with low memory  
345 requirements. *Nat. Methods* **12**, 357–360 (2015).
- 346 80. Olney, K. C., Brotman, S. M., Valverde-Vesling, V., Andrews, J. & Wilson, M. A. Aligning  
347 RNA-Seq reads to a sex chromosome complement informed reference genome increases  
348 ability to detect sex differences in gene expression. *BioRxiv* 668376 (2019).
- 349 81. Pertea, M. *et al.* StringTie enables improved reconstruction of a transcriptome from RNA-  
350 seq reads. *Nat. Biotechnol.* **33**, 290–295 (2015).

- 351 82. Love, M., Anders, S. & Huber, W. Differential analysis of count data--the DESeq2 package.  
352 *Genome Biol.* **15**, 10–1186 (2014).
- 353 83. Langfelder, P. & Horvath, S. WGCNA: an R package for weighted correlation network  
354 analysis. *BMC Bioinformatics* **9**, 559 (2008).
- 355 84. Love, M. I., Huber, W. & Anders, S. Moderated estimation of fold change and dispersion for  
356 RNA-seq data with DESeq2. *Genome Biol.* **15**, 550 (2014).
- 357 85. Csardi, G., Nepusz, T. & Others. The igraph software package for complex network  
358 research. *InterJournal, complex systems* **1695**, 1–9 (2006).
- 359 86. Briatte, F. ggnetwork: Geometries to Plot Networks with 'ggplot2'. *R package version 0.5.1*,  
360 (2016).
- 361 87. Alexa, A. & Rahnenfuhrer, J. topGO: enrichment analysis for gene ontology. *R package*  
362 *version 2*, 2010 (2010).
- 363 88. Yu, G. *et al.* GOSemSim: an R package for measuring semantic similarity among GO terms  
364 and gene products. *Bioinformatics* **26**, 976–978 (2010).
- 365 89. Kanehisa, M. & Goto, S. KEGG: kyoto encyclopedia of genes and genomes. *Nucleic Acids*  
366 *Res.* **28**, 27–30 (2000).
- 367 90. Alaba, S. *et al.* The liverwort *Pellia endiviifolia* shares microtranscriptomic traits that are  
368 common to green algae and land plants. *New Phytol.* **206**, 352–367 (2015).
- 369 91. Johnson, M. G., Malley, C., Goffinet, B., Shaw, A. J. & Wickett, N. J. A phylotranscriptomic  
370 analysis of gene family expansion and evolution in the largest order of pleurocarpous  
371 mosses (Hypnales, Bryophyta). *Mol. Phylogenet. Evol.* **98**, 29–40 (2016).
- 372 92. Gao, S. *et al.* Cloning and functional characterization of a phenolic acid decarboxylase from  
373 the liverwort *Conocephalum japonicum*. *Biochem. Biophys. Res. Commun.* **481**, 239–244  
374 (2016).
- 375 93. Li, F.-W. *et al.* Fern genomes elucidate land plant evolution and cyanobacterial symbioses.  
376 *Nat Plants* **4**, 460–472 (2018).
- 377 94. Grabherr, M. G. *et al.* Full-length transcriptome assembly from RNA-Seq data without a  
378 reference genome. *Nat. Biotechnol.* **29**, 644–652 (2011).
- 379 95. Haas, B., Papanicolaou, A. & Others. TransDecoder (find coding regions within transcripts).  
380 *Github, nd <https://github.com/TransDecoder/TransDecoder> (accessed May 17, 2018)*  
381 (2015).
- 382 96. Bateman, A. *et al.* Pfam 3.1: 1313 multiple alignments and profile HMMs match the majority  
383 of proteins. *Nucleic Acids Res.* **27**, 260–262 (1999).
- 384 97. Li, W. & Godzik, A. Cd-hit: a fast program for clustering and comparing large sets of protein  
385 or nucleotide sequences. *Bioinformatics* **22**, 1658–1659 (2006).
- 386 98. Fu, L., Niu, B., Zhu, Z., Wu, S. & Li, W. CD-HIT: accelerated for clustering the next-  
387 generation sequencing data. *Bioinformatics* **28**, 3150–3152 (2012).
- 388 99. Emms, D. M. & Kelly, S. OrthoFinder: phylogenetic orthology inference for comparative  
389 genomics. *Genome Biol.* **20**, 238 (2019).
- 390 100. Emms, D. M. & Kelly, S. OrthoFinder: solving fundamental biases in whole genome  
391 comparisons dramatically improves orthogroup inference accuracy. *Genome Biol.* **16**, 157  
392 (2015).
- 393 101. Katoh, K. & Standley, D. M. MAFFT multiple sequence alignment software version 7:  
394 improvements in performance and usability. *Mol. Biol. Evol.* **30**, 772–780 (2013).

- 395 102. Suyama, M., Torrents, D. & Bork, P. PAL2NAL: robust conversion of protein sequence  
396 alignments into the corresponding codon alignments. *Nucleic Acids Res.* **34**, W609–12  
397 (2006).
- 398 103. Capella-Gutiérrez, S., Silla-Martínez, J. M. & Gabaldón, T. trimAl: a tool for automated  
399 alignment trimming in large-scale phylogenetic analyses. *Bioinformatics* **25**, 1972–1973  
400 (2009).
- 401 104. Stamatakis, A. RAxML version 8: a tool for phylogenetic analysis and post-analysis of large  
402 phylogenies. *Bioinformatics* **30**, 1312–1313 (2014).
- 403 105. Yu, G., Smith, D. K., Zhu, H., Guan, Y. & Lam, T. T. ggtree : an r package for visualization  
404 and annotation of phylogenetic trees with their covariates and other associated data.  
405 *Methods Ecol. Evol.* **8**, 28–36 (2017).
- 406 106. Yu, G., Lam, T. T.-Y., Zhu, H. & Guan, Y. Two Methods for Mapping and Visualizing  
407 Associated Data on Phylogeny Using Ggtree. *Mol. Biol. Evol.* **35**, 3041–3043 (2018).
- 408 107. Junier, T. & Zdobnov, E. M. The Newick utilities: high-throughput phylogenetic tree  
409 processing in the UNIX shell. *Bioinformatics* **26**, 1669–1670 (2010).
- 410 108. Huerta-Cepas, J., Serra, F. & Bork, P. ETE 3: Reconstruction, Analysis, and Visualization  
411 of Phylogenomic Data. *Mol. Biol. Evol.* **33**, 1635–1638 (2016).
- 412 109. Zhang, Z. *et al.* KaKs\_Calculator: calculating Ka and Ks through model selection and model  
413 averaging. *Genomics Proteomics Bioinformatics* **4**, 259–263 (2006).
- 414 110. Wright, F. The ‘effective number of codons’ used in a gene. *Gene* **87**, 23–29 (1990).
- 415 111. Stenico, M., Lloyd, A. T. & Sharp, P. M. Codon usage in *Caenorhabditis elegans*:  
416 delineation of translational selection and mutational biases. *Nucleic Acids Res.* **22**, 2437–  
417 2446 (1994).
- 418 112. Team, R. C. & Others. R: A language and environment for statistical computing. (2013).
- 419 113. Wickham, H. *ggplot2: Elegant Graphics for Data Analysis*. (Springer, 2016).
- 420 114. Luo, M. & Wing, R. A. An improved method for plant BAC library construction. *Methods*  
421 *Mol. Biol.* **236**, 3–20 (2003).
- 422 115. Ewing, B., Hillier, L., Wendl, M. C. & Green, P. Base-Calling of Automated Sequencer  
423 Traces Using Phred. I. Accuracy Assessment. *Genome Res.* **8**, 175–185 (1998).
- 424 116. Ewing, B. & Green, P. Base-calling of automated sequencer traces using phred. II. Error  
425 probabilities. *Genome Res.* **8**, 186–194 (1998).
- 426 117. Gordon, D., Abajian, C. & Green, P. Consed: a graphical tool for sequence finishing.  
427 *Genome Res.* **8**, 195–202 (1998).
- 428 118. Perroud, P.-F. *et al.* The *Physcomitrella patens* gene atlas project: large-scale RNA-seq  
429 based expression data. *Plant J.* **95**, 168–182 (2018).
- 430 119. Cove, D. J. *et al.* Culturing the moss *Physcomitrella patens*. *Cold Spring Harb. Protoc.*  
431 **2009**, db.prot5136 (2009).
- 432 120. Leder, E. H. *et al.* Female-biased expression on the X chromosome as a key step in sex  
433 chromosome evolution in threespine sticklebacks. *Mol. Biol. Evol.* **27**, 1495–1503 (2010).
- 434 121. Jurka, J. *et al.* Repbase Update, a database of eukaryotic repetitive elements. *Cytogenet.*  
435 *Genome Res.* **110**, 462–467 (2005).
- 436 122. Yuan, Y.-W. & Wessler, S. R. The catalytic domain of all eukaryotic cut-and-paste  
437 transposase superfamilies. *Proc. Natl. Acad. Sci. U. S. A.* **108**, 7884–7889 (2011).
- 438 123. Tsubouchi, H. & Roeder, G. S. The Mnd1 protein forms a complex with hop2 to promote

439 homologous chromosome pairing and meiotic double-strand break repair. *Mol. Cell. Biol.*  
440 **22**, 3078–3088 (2002).

441



442 **Acknowledgements:** The authors thank Ralph Quatrano, David Cove, and the Quatrano  
443 laboratory at Washington University in St. Louis for incubating the *C. purpureus* genome project;  
444 Bernie Hauser, Thomas Colquhoun, and Drake Garner for assisting with the hormone and light  
445 perturbations; Bernard Goffinet, Michelle Mack, Sharon Robinson, Todd Rosenstiel, Blanka  
446 Shaw, and the late Norton Miller for providing field collections. Susanne Renner, Sally Otto,  
447 Mark Kirkpatrick, and Matthew Hahn provided valuable feedback on a draft of the manuscript.  
448 The One Thousand Plant Transcriptome Initiative generously provided early access to moss  
449 and liverwort data, and the University of Florida Interdisciplinary Center for Biotechnology  
450 Research and HiPerGator provided vital technical support throughout the project. This work was  
451 supported by NSF DEB-1541005 and start-up funds from UF to SFM; microMORPH Cross-  
452 Disciplinary Training Grant, Sigma-Xi Grant-In-Aid of Research, and Society for the Study of  
453 Evolution Rosemary Grant Award to SBC; NSF DEB-1239992 to NJW; Emil Aaltonen  
454 Foundation and the University of Turku to SO; NSF DEB-1541506 to JGB and SFM. The work  
455 conducted by the U.S. Department of Energy Joint Genome Institute was supported by the  
456 Office of Science of the U.S. Department of Energy under Contract No. DE-AC02-05CH11231.

457

458 **Author contributions:** Conceptualization: SFM; Data curation: SBC, KB; Formal analysis:  
459 SBC, JJ, SS, JTL, FM, AS, GPT, NFP, SAR; Funding acquisition: SBC, SH, NJW, JGB, SAR,  
460 SFM; Investigation: SBC, JJ, ACP, SS, JTL, FM, AS, GPT, NFP, CC, MW, AL, CD, CS, JCM,  
461 REC, LMK, SO, SH, JBL, JGB, SAR, SFM; Methodology: SBC, ACP, JJ, JS, SFM; Project  
462 administration: SBC, KB, JG, JS, SFM; Resources: NJW, MJG, JG, JS, SFM; Supervision:  
463 MGJ, SAR, JG, JS, SFM; Visualization: SBC, JJ, JTL, AS, GPT; Writing – original draft: SBC,  
464 SFM; Writing – review and editing: SBC, ACP, JJ, JTL, FM, AS, GPT, CAS, LMK, JGB NJW,  
465 MGJ, SAR, JG, JS, SFM. All authors approve of the final draft of this manuscript.

466

467 **Competing interests:** The authors declare no competing interests.

468

469 **Data availability:** DNA and RNA data for this manuscript can be found under NCBI BioProjects  
470 listed in Supplementary Table 5. The R40 and GG1 v1.0 genome assemblies can be found on  
471 NCBI GenBank under the accessions JACMSA000000000 and JACMSB000000000,  
472 respectively. The genome assemblies and annotations can also be found on Phytozome  
473 (<https://phytozome-next.jgi.doe.gov/>). The Lanisha transposable element has been deposited in  
474 NCBI GenBank under MT647524. The published sequence data used in this study can be found  
475 in Supplementary Table 16. Supporting documents for the phylogenomic analysis of sex-linked  
476 genes can be found on Dryad under <https://doi.org/10.5061/dryad.v41ns1rsm>.

477

478 **Materials and correspondence:** Materials and correspondence should be addressed to  
479 [stuartmcdaniel@ufl.edu](mailto:stuartmcdaniel@ufl.edu).

480

481 **Figures**

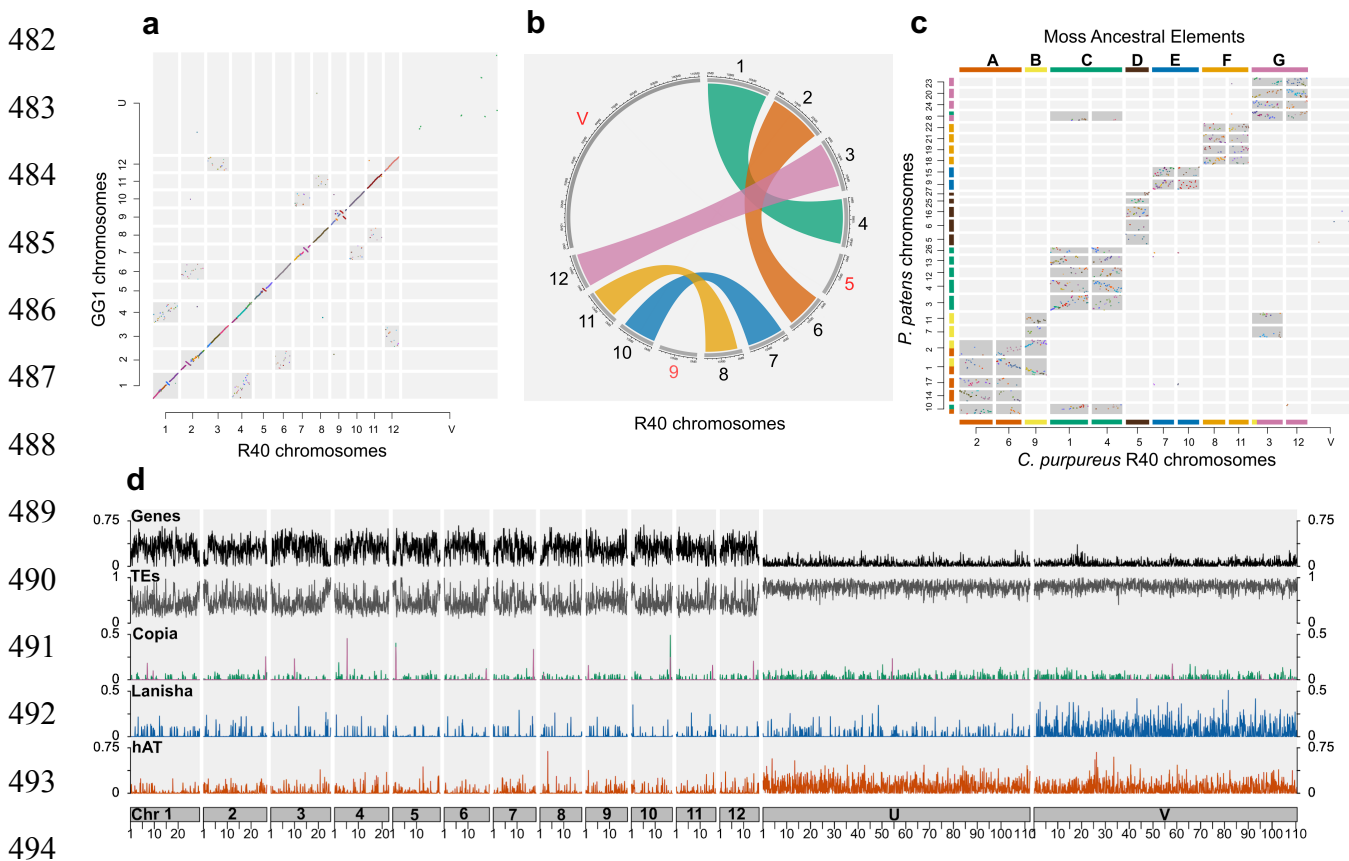

495 **Fig. 1. Chromosome architecture in *C. purpureus*.** **a**, Dot plot of syntenic orthogroup blastp  
 496 hits between *C. purpureus* GG1 and R40 isolates, showing structural variation on autosomes  
 497 and a lack of synteny across the sex chromosomes. **b**, Self-synteny plot of *C. purpureus* R40  
 498 isolate showing homeologous chromosomes from a whole-genome duplication. **c**, Dot plot of  
 499 syntenic orthogroup blastp hits between *C. purpureus* R40 and *P. patens*, highlighting the seven  
 500 ancestral chromosomes that we refer to as the moss ancestral elements A-G. **d**, Density plots  
 501 across *C. purpureus* chromosomes (in Mb). Densities show the proportion of a 100 Kilobase  
 502 (Kb) window (90 Kb jump) of each feature. Local density peaks of RLC5 Copia elements (purple  
 503 Copia peaks) on each chromosome represent candidate centromeric regions, similar to *P.*  
 504 *patens*<sup>12</sup>.

505

506

507

508

509

510

511

512

513

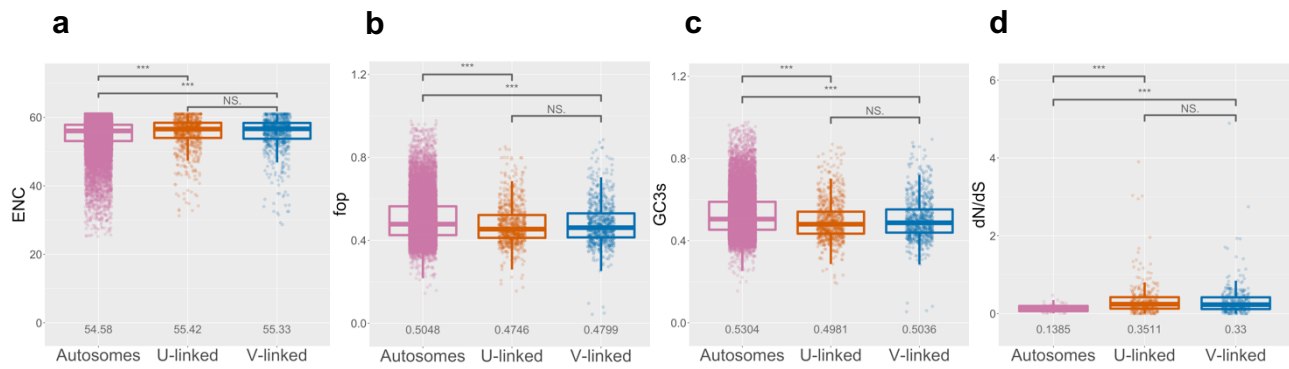

514 **Fig. 2. Molecular evolution of autosomal and sex-linked genes in *C. purpureus*.** a,

515 Autosomal genes are significantly different from U or V-linked genes in the effective number of

516 codons (ENC) b, Frequency of optimal codons (fop) c, GC content of the third, synonymous

517 codon (GC3s) and d, Protein evolution (dN/dS) (*MWU*, autosomes to U or V  $P < 6 \times 10^{-6}$  for all

518 metrics, indicated by \*\*\*; numbers show means). However, U and V-linked genes were not

519 significantly different (*MWU*, ENC  $P = 0.8$ ; fop  $P = 0.22$ ; GC3s  $P = 0.18$ ; dN/dS  $P = 0.73$ , indicated by

520 NS), suggesting weak but not significantly different degeneration on the U and V.

521  
522  
523  
524  
525  
526  
527  
528  
529

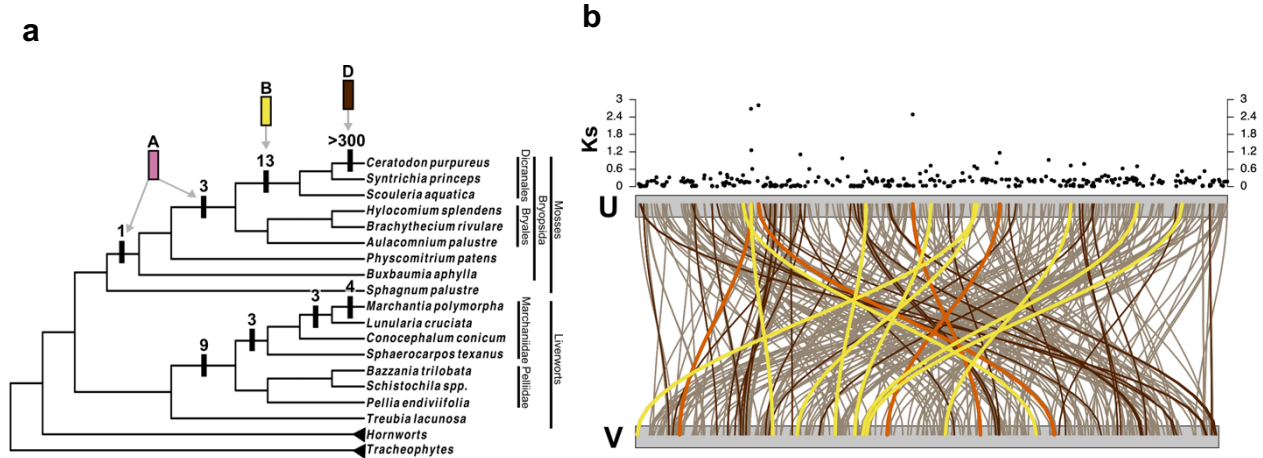

530 **Fig. 3. Evolutionary history of moss and liverwort sex chromosomes.** **a**, Capture events of  
531 genes on moss and liverwort sex chromosomes. Numbers indicate how many extant genes  
532 were captured at the indicated branch based on the topology of the tree. The capture events in  
533 mosses can be traced back to three ancestral elements (A, B, and D), where the oldest sex-  
534 linked genes were from ancestral element A and homeologous chromosomes from B and D  
535 fused to the sex chromosomes. **b**, *Ks* of one-to-one U-V orthologs plotted on U and V sex  
536 chromosomes of *C. purpureus*. Lines connect the U-V orthologs, where colors correspond to the  
537 ancestral elements in **a**. The darker brown lines indicate genes with  $Ks \leq 0.02$ , presumably  
538 representing the most recently captured genes, which highlights the rapid rearrangement of  
539 genes on the sex chromosomes. These data, in addition to synteny (Fig. 1), also suggest a lack  
540 of a pseudoautosomal region between the *C. purpureus* U and V.

541 **Methods**

542

543 **Isolate collection and tissue culture.** All *C. purpureus* tissue used in this study was isolated  
544 from a single-spore<sup>35</sup>, from field-collected sporophytes (Supplementary Table 5)<sup>10,36</sup>. In-depth  
545 methods for tissue generation for DNA and RNA, library preparation, and sequencing can be  
546 found in the Supplementary Methods.

547

548 **Genome assemblies.** We sequenced *C. purpureus* (var. GG1 and var. R40) using a whole-  
549 genome shotgun sequencing strategy and standard sequencing protocols. Sequencing reads  
550 were collected using Illumina, PacBio, and Sanger platforms. Illumina, PacBio, and Sanger  
551 reads were sequenced at the Department of Energy (DOE) Joint Genome Institute (JGI) in  
552 Walnut Creek, California and the HudsonAlpha Institute in Huntsville, Alabama. Illumina reads  
553 were sequenced using the Illumina HiSeq-2000 and X10 platform and the PacBio reads were  
554 sequenced using the SEQUEL I platform. Sanger BACs were sequenced using an ABI 3730XL  
555 capillary sequencer. For both GG1 and R40, one 400bp insert 2x150 Illumina fragment library  
556 (133.14x for GG1, 146.45x for R40) was sequenced along with one 2x150 Dovetail HiC library  
557 (252.86x GG1, 442.71x R40) (Supplementary Table 1). Prior to assembly, Illumina fragment  
558 reads were screened for phix contamination. Reads composed of >95% simple sequence were  
559 removed. Illumina reads <50bp after trimming for adapter and quality (q<20) were removed. For  
560 the PacBio sequencing, a total of 8 PB chemistry 2.1 cells (10 hour movie time) were  
561 sequenced each for GG1 and R40 on Sequel 1 with a raw sequence yield of 39.82 Gb (GG1)  
562 and 46.24 Gb (R40) with a total coverage of 113.77x (GG1) and 132.11x (R40) (Supplementary  
563 Table 2). Finally, a total of 1,032 BAC clones sequenced with Illumina indexed libraries were  
564 used for patching the final chromosome gaps.

565

566 *Genome assembly and construction of pseudomolecule chromosomes:* Improved versions 1.0  
567 of the *C. purpureus* (var. GG1 and var. R40) assemblies were generated by assembling the  
568 4,195,510 PacBio GG1 reads (113.77x sequence coverage) and 5,238,148 PacBio reads R40  
569 (132.11x sequence coverage) separately using the MECAT assembler<sup>37</sup> and subsequently  
570 polished using QUIVER<sup>38</sup>. For GG1, this produced 637 scaffolds (637 contigs), with a contig  
571 N50 of 1.2 Mb, 475 scaffolds larger than 100 Kb, and a total genome size of 347.1 Mb  
572 (Supplementary Table 3). For R40, this produced 731 scaffolds (731 contigs), with a contig N50  
573 of 1.1 Mb, 497 scaffolds larger than 100 Kb, and a total genome size of 361.3 Mb  
574 (Supplementary Table 3).

575 Hi-C scaffolding using the JUICER pipeline<sup>39</sup> was used to identify misjoins in the initial  
576 MECAT assembly. Misjoins were characterized as a discontinuity in the GG1 or R40 linkage  
577 group. A total of 73 misjoins were identified and resolved in GG1 and 64 in R40. The resulting  
578 broken contigs were then oriented, ordered, and joined together into 13 chromosomes (12  
579 autosomal and 1 sex chromosome designated as “U” in the GG1 release and 12 autosomal and  
580 1 sex chromosome designated as “V” in the R40 release) using both the map, as well as the Hi-  
581 C data. A total of 579 joins were made in GG1 and 625 in R40 during this process. Each  
582 chromosome join is padded with 10,000 Ns. Significant telomeric sequence was identified using  
583 the (TTTAGGG)<sub>n</sub> repeat, and care was taken to make sure that it was properly oriented in the  
584 production assembly. The remaining scaffolds were screened against bacterial proteins,  
585 organelle sequences, GenBank nr and removed if found to be a contaminant. For GG1, a set of  
586 1,032 BAC clones (107.8 Mb total sequence) sequenced with Illumina indexed libraries were  
587 used to patch remaining gaps in the chromosomes. Clones were aligned to the chromosomes  
588 using BLAT<sup>40</sup>, and clone contigs crossing gaps were used to form patches. A total of 35 gaps  
589 were patched.

590 Finally, homozygous SNPs and INDELS were corrected in the release consensus  
591 sequence using ~88x of Illumina reads (2x150, 400bp insert) by aligning the reads using bwa

592 mem<sup>41</sup> and identifying homozygous SNPs and INDELS with the GATK's UnifiedGenotyper tool<sup>42</sup>.  
593 A total of 108 homozygous SNPs and 5,291 homozygous INDELS in GG1 and 19 homozygous  
594 SNPs and 867 homozygous INDELS in R40 were corrected in the release. The final version 1.0  
595 GG1 release contains 349.5 Mb of sequence (1.3% gap), consisting of 558 contigs with a contig  
596 N50 of 1.4 Mb and a total of 97.9% of assembled bases in chromosomes. The final version 1.0  
597 R40 release contains 358.0 Mb of sequence (1.2% gap), consisting of 601 contigs with a contig  
598 N50 of 1.4 Mb and a total of 98.3% of assembled bases in chromosomes.

599       Completeness of the euchromatic portion of the version 1.0 GG1 and 1.0 R40  
600 assemblies was assessed by aligning an rnaSEQ library (library code GNGZB for GG1, GNGZC  
601 for R40). The aim of this analysis is to obtain a measure of completeness of the assembly,  
602 rather than a comprehensive examination of gene space. The transcripts were aligned to the  
603 assembly using GSNAP<sup>43</sup>. The alignments indicate that 96.88% of the GG1 RNAseq reads  
604 aligned to the version 1.0 GG1 release and 97.01% of the R40 RNAseq reads aligned to the  
605 version 1.0 R40 release.

606  
607 *Construction of the scaffold assembly:* A total of 4,195,510 PacBio reads (113.77x) in GG1 and  
608 5,238,148 PacBio reads (132.11x) in R40 were assembled using MECAT<sup>37</sup>, and formed the  
609 starting point of the version 1.0 release for each. The 310,662,272 Illumina sequence reads  
610 (133.14x sequence coverage) in GG1 and 353,932,084 Illumina sequence reads (146.45x  
611 sequence coverage) in R40 were used for fixing homozygous snp/indel errors in the consensus.  
612 A total of 310,662,272 Hi-C reads (252.86x sequence coverage) in GG1 and 1,062,837,932 Hi-  
613 C reads (442.71x sequence coverage) in R40 were used for chromosome construction.

614  
615 *Screening and final assembly release:* Scaffolds that were not anchored in a chromosome were  
616 classified into bins depending on sequence content. Contamination was identified using blastn  
617 against the NCBI nucleotide collection (NR/NT) and blastx using a set of known microbial



618 proteins. In GG1, additional scaffolds were classified as repetitive (>95% masked with 24mers  
619 that occur more than 4 times in the genome) (16 scaffolds, 482.8 Kb), chloroplast (1 scaffold,  
620 158.7 Kb), and low quality (>50% unpolished bases post polishing, 3 scaffolds, 48.3 Kb) In R40,  
621 additional scaffolds were classified as repetitive (>95% masked with 24mers that occur more  
622 than 4 times in the genome) (12 scaffolds, 489.6 Kb), chloroplast (1 scaffold, 50.2 Kb), and low  
623 quality (>50% unpolished bases post polishing, 6 scaffolds, 236.8 Kb). Resulting final statistics  
624 are shown in Supplementary Table 4.

625

626 *GG1 assessment of assembly accuracy:* A set of 17 finished contiguous Sanger BAC clones  
627 >100Kb were selected in order to assess the accuracy of the assembly. A range of variants  
628 were detected in the comparison of the BAC clones and the assembly. In 14 of the BAC clones,  
629 the alignments were of high quality (< 0.05% bp error) with an example being given in  
630 Supplementary Fig. 1. All dot plots were generated using Gepard<sup>44</sup>. The remaining 3 BACs  
631 indicate a higher error rate due mainly to their placement in more regions containing tandem  
632 repeats (Supplementary Fig. 2). The overall bp error rate in the BAC clones is 0.016% (269  
633 discrepant bp out of 1,599,605 bp).

634

635 **Genome Annotations.** Transcript assemblies were made from ~1.5 billion pairs of 2x150  
636 stranded paired-end Illumina RNA-seq reads from *C. purpureus* GG1 and ~1.6 billion pairs from  
637 *C. purpureus* R40 using PERTRAN (Shu, unpublished), PERTRAN assemblies from  
638 G100m\_X\_G150f\_Sporo reads on the *C. purpureus* GG1 or R40 genome, and filtered open  
639 reading frames (ORFs) from Trinity assemblies from stranded paired-end Illumina reads from  
640 additional *C. purpureus* cultivars (Chile, Dur, Ecu, Ren, and UCONN; Supplementary Table 5)  
641 180,954 (GG1) and 194,414 (R40) transcript assemblies were constructed using PASA<sup>45</sup> from  
642 RNA-seq transcript assemblies above and a bit of *C. purpureus* ESTs. Loci were determined by  
643 transcript assembly alignments and/or EXONERATE alignments of proteins from *Arabidopsis*

644 *thaliana*<sup>46</sup>, soybean<sup>47</sup>, *Setaria viridis*<sup>48</sup>, grape<sup>49</sup>, *Sphagnum magellanicum*, *Physcomitrium*  
645 *patens*<sup>12</sup>, *Selaginella moellendorffii*<sup>50</sup>, *Chlamydomonas reinhardtii*<sup>51</sup>, filtered Trinity assembly  
646 ORFs described above, high-confidence gene models from the first round of *C. purpureus* R40  
647 gene call, uniprot Bryopsida and Swiss-Prot proteomes to repeat-soft-masked *C. purpureus*  
648 GG1 genome using RepeatMasker<sup>52</sup> with up to 2K BP extension on both ends unless extending  
649 into another locus on the same strand. Repeat library consists of De Novo repeats by  
650 RepeatModeler<sup>53</sup> on *C. purpureus* GG1 genome and repeats in RepBase. Gene models were  
651 predicted by homology-based predictors, FGENESH+<sup>54</sup>, FGENESH\_EST (similar to  
652 FGENESH+, EST as splice site and intron input instead of protein/translated ORF), and  
653 EXONERATE<sup>55</sup>, PASA assembly ORFs (in-house homology constrained ORF finder) and from  
654 AUGUSTUS via BRAKER1<sup>56</sup>. The best scored predictions for each locus are selected using  
655 multiple positive factors including EST and protein support, and one negative factor: overlap  
656 with repeats. The selected gene predictions were improved by PASA. Improvement includes  
657 adding UTRs, splicing correction, and adding alternative transcripts. PASA-improved gene  
658 model proteins were subject to protein homology analysis to above mentioned proteomes to  
659 obtain Cscore and protein coverage. Cscore is a protein BLASTP score ratio to MBH (mutual  
660 best hit) BLASTP score and protein coverage is the highest percentage of protein aligned to the  
661 best of homologs. PASA-improved transcripts were selected based on Cscore, protein  
662 coverage, EST coverage, and its CDS overlapping with repeats. The transcripts were selected if  
663 its Cscore is larger than or equal to 0.5 and protein coverage larger than or equal to 0.5, or it  
664 has EST coverage, but its CDS overlapping with repeats is less than 20%. For gene models  
665 whose CDS overlaps with repeats for more than 20%, its Cscore must be at least 0.9 and  
666 homology coverage at least 70% to be selected. The selected gene models were subject to  
667 Pfam analysis and gene models whose protein is more than 30% in Pfam TE domains were  
668 removed and weak gene models. Incomplete gene models, low homology supported without

669 fully transcriptome supported gene models and short single exon (<300 bp CDS) without protein  
670 domain nor good expression gene models were manually filtered out.

671

672 **Synteny analysis within *C. purpureus* and between *P. patens*.** We ran the default  
673 GENESPACE pipeline<sup>57</sup> with a minimum block size of 5 genes and a maximum gap / search  
674 radius of 15 genes. In short, GENESPACE runs orthofinder on synteny-constrained blastp hits.  
675 This offers higher stringency when exploring highly diverged genomes (or ancient whole-  
676 genome duplications) by removing high scoring, but randomly distributed, blast hits.

677

678 **Ks-plot analysis to identify the *C. purpureus* whole-genome duplication.** Whole-genome  
679 duplications (WGD) were detected with conventional *Ks* plot analyses. We used the wgd  
680 pipeline<sup>58</sup>. An all-by-all BLASTP search<sup>59</sup> was performed for the *C. purpureus* GG1 and R40  
681 genomes as well as *P. patens* and *M. polymorpha*. Paralogs were clustered with MCL<sup>60</sup>. For  
682 each cluster, all pairwise *Ks* estimates were obtained from PAM<sup>61</sup> with the GY94 model with  
683 F3x4 equilibrium codon frequencies<sup>62</sup>. Hierarchical clustering was used to reduce redundant  
684 comparisons and obtain node-averaged *Ks* estimates. This process was repeated for syntenic  
685 paralogs too, which were obtained from I-ADHoRe v3.0 with default settings<sup>63</sup> based on all-by-  
686 all BLASTP results. Orthologous gene divergences used reciprocal best BLASTP hits between  
687 *C. purpureus* and *P. patens*.

688 Peaks in *Ks* plots can be identified visually, but we also applied mixture models that  
689 were selected by the difference in BIC scores, such that a difference less than 3.2 is used as a  
690 stopping criterion. Mixture models were implemented with the *bic.test.wgd* function available on  
691 GitHub ([https://github.com/gtiley/Ks\\_plots](https://github.com/gtiley/Ks_plots)). Mixture models can be problematic in their  
692 interpretation due to over-fitting, therefore we looked for peaks that were consistently detected  
693 across models and the maximum *Ks* value allowed<sup>64</sup>. When analyzing all paralogs, a single  
694 prominent peak was observable in *C. purpureus* with a mean between a *Ks* of 0.65 and 0.97 in

695 GG1 and a  $K_s$  between 0.68 and 0.74 in R40 (Supplementary Table 6). The more consistent  
696 results in R40 imply more paralogs from this WGD event have survived on the V chromosome  
697 compared to the U chromosome. This WGD post-dates the divergence of *C. purpureus* and *P.*  
698 *patens* (Fig. S12). This is determined by visual inspection but agrees with previous analyses of  
699 WGD in both *C. purpureus* and *P. patens*<sup>10-12</sup>. The presence of a single WGD that occurred in  
700 *C. purpureus* following divergence from *P. patens* is supported by analyses of syntenic paralogs  
701 as well (Extended Fig. 1), which suggest slightly more recent WGD ages (Supplementary Table  
702 6). However, analyses of syntenic paralogs from *P. patens* supported the presence of two  
703 WGDs following divergence from *C. purpureus* (Supplementary Table 6), similar to previous  
704 findings when using syntenic data<sup>12</sup> compared to all paralogs from genomic or transcriptomic  
705 data<sup>11,65</sup>.

706  $K_s$ -plot analyses are provocative of older WGD events that pre-date the divergence of *C.*  
707 *purpureus* and *P. patens*. Notably low numbers of syntenic paralogs are evident between  $K_s$  of  
708 3.0 and 4.0; although, the same is true for *M. polymorpha* that putatively has no history of  
709 ancient WGD. Any identifiable peaks in  $K_s$  plot analyses are too speculative given lack of  
710 evidence from mixture models, and nor do their existence affect our proposed model of  
711 karyotype evolution. It should be noted though that analyses of gene trees that reconcile  
712 duplication and loss events onto a species tree have implied a shared large-scale duplication  
713 event shared by *C. purpureus* and *P. patens* ("B3"<sup>11</sup>) and an even older event shared by all  
714 mosses ("B2"<sup>11</sup>). Testing such ancient hypotheses is beyond the scope of  $K_s$  plot analyses,  
715 even with syntenic data. Rather, macrosyntenic evidence from more moss species, such as  
716 *Sphagnum fallax*, will be needed to identify the presence of expected syntenic ratios among  
717 genes, similar to the identifiable 1:4 ratios between *C. purpureus* and *P. patens* investigated  
718 here.

719

720 **Transposable element annotation.** We combined R40 assembly (autosomes and V) with the  
721 U sex chromosome assembled from GG1 to run *de novo* repeat detection using the TEdenovo  
722 pipeline from the REPET package (v2.4)<sup>66</sup>. Parameters were set to consider repeats with at  
723 least 5 copies. We obtained a library of 4,699 consensus sequences that was filtered to keep  
724 only those that are found at least once as full length copy in the combined assembly and we  
725 retained 2,523 of them. This library of consensus sequences was then used as digital probe for  
726 whole genome annotation by the TEannot<sup>67</sup> pipeline from the REPET package v2.4. Threshold  
727 annotation scores were determined for each consensus as the 99th percentile of the scores  
728 obtained against a randomized sequence (reversed input, not complemented and masked using  
729 Tandem Repeats Finder with parameters 2 7 7 80 10 70 10<sup>68</sup>). The library of consensus  
730 sequences was classified using PASTEC followed by manual curation<sup>69</sup>. To improve  
731 classification, remote homology detection was performed using HH-suite3<sup>70</sup>. For the density plot  
732 of genes and TEs (Fig. 1), we calculated the proportion of coverage of each feature in a 100 Kb  
733 window with a 90 Kb jump using Bedtools (v2.27.)<sup>71</sup>. These results were plotted in R (v3.5.3)<sup>72</sup>  
734 using the package karyoploteR (v1.8.8)<sup>73</sup> and edited in Inkscape (v0.92.2)  
735 (<https://inkscape.org/en/>) (ceratodon\_genome\_plots.R,  
736 <https://doi.org/10.5061/dryad.v41ns1rsm>). To examine differences in enrichment between the  
737 autosomes, U, and V we ran a pairwise Mann-Whitney U test with a Benjamini and Hochberg  
738 correction for multiple tests<sup>74,75</sup> using the sliding window densities ( $n_{\text{Auto}}=2736$ ,  $n_U=1247$ ,  
739  $n_V=1229$ ).

740

741 **Transcription factor and regulator annotation.** Transcription associated proteins (TAPs)  
742 comprise transcription factors (TFs, acting in sequence-specific manner, typically by binding to  
743 cis-regulatory elements) and transcriptional regulators (TRs, acting on chromatin or via protein-  
744 protein interaction). We classified all *C. purpureus* proteins into 122 families and sub-families of  
745 TAPs by a domain-based rule set<sup>76,77</sup>. We compared this genome-wide classification with

746 relevant organisms. All proteins in which a domain was found are listed with their family  
747 assignment. In cases when the domain composition does not allow an unambiguous  
748 assignment they are assigned no\_family\_found.

749

750 **Gene expression and co-expression.** Gene expression and co-expression analyses were  
751 done using three male-female sibling pairs ( $n_{\text{isolates}}=6$ , 3 of each sex) at gametophore and  
752 protonemal stages ( $n_{\text{stages}}=2$ ) in triplicate ( $n_{\text{replicates}}=3$ ) (Supplementary Table 5; see  
753 Supplementary Methods for details on tissue conditions). Raw reads were filtered for  
754 contaminants and adapters removed using BBDuk (v38.00) (Bushnell,  
755 <http://bibttools.jgi.doe.gov>). This included removing reads with 93% identity to human, mouse,  
756 dog, or cat or align to common microbial references. Further filtering removed reads with any  
757 'N's, an average quality of 10, or a length <50 or 33% of the full read length. Adapters were  
758 trimmed and reads were right-quality-trimmed if quality was below 6. Paired-end reads were  
759 split into forward and reverse reads (novaseq\_FASTQ\_de\_interlacer.pl,  
760 <https://doi.org/10.5061/dryad.v41ns1rsm>). Reads were further filtered for quality using  
761 Trimmomatic (v0.36)<sup>78</sup> using leading and trailing values of 3, window size of 10, quality score of  
762 30, and minimum length of 40. We assessed the quality of the remaining reads using fastqc  
763 (v0.11.4) (Andrews, 2010).

764 Filtered reads were mapped using HISAT2 (v2.1.0)<sup>79</sup> to the *C. purpureus* R40 genome  
765 (autosomes and V sex chromosome) concatenated with the GG1 U sex chromosome. We hard  
766 masked the U chromosome for males, and the V for females, using Bedtools (v2.27.1)<sup>71</sup>  
767 maskfasta<sup>80</sup>. Genes greater than 300bp were assembled using StringTie (v1.3.3)<sup>81</sup>, gene counts  
768 were extracted using StringTie's prepDE.py script  
769 (<http://ccb.jhu.edu/software/stringtie/index.shtml?t=manual#deseq>), and gene IDs renamed  
770 (using mstrg\_prep.pl, <https://gist.github.com/gpertia/b83f1b32435e166afa92a2d388527f4b>).  
771 Only genes matching the original genome annotation file were used for co-expression analyses

772 below. To identify differentially-expressed genes (DEGs), we used DESeq2 (v1.22.2<sup>82</sup>) where  
773 we contrasted males and females at both the protonemal and gametophore stages. For  
774 autosomal genes, we removed those with baseMean<1, a log<sub>2</sub> fold change<1, and an adjusted  
775 p-value <0.05. For sex-linked genes, we calculated the mean normalized count across only  
776 males or females for protonema and gametophore separately. To identify which sex-linked  
777 genes were sex-specific we used the output from Orthofinder below.

778

779 *Co-expression network construction and module detection:* Weighted gene co-expression  
780 networks were constructed using the WGCNA R package (v1.69)<sup>83</sup> with genes expression data  
781 normalized using variance stabilizing transformation from the DESeq2 R package (v1.26.0)<sup>84</sup>.  
782 The data retained after filtering genes showing low expression levels (minimum read count = 6  
783 and minimum total read count = 10) were used to construct co-expression network modules  
784 using the block-wise network construction procedures. Briefly, pairwise Pearson correlations  
785 between each gene pair were weighted by raising them to power ( $\beta$ ). To select a proper soft-  
786 thresholding power, the network topology for a range of powers was evaluated and appropriate  
787 power was chosen that ensured an approximate scale-free topology of the resulting network.  
788 The pairwise weighted matrix was transformed into topological overlap measure (TOM). And the  
789 TOM-based dissimilarity measure (1 – TOM) was used for hierarchical clustering and initial  
790 module assignments were determined using a dynamic tree-cutting algorithm. Pearson  
791 correlations between each gene and each module eigengene, referred to as a gene's module  
792 membership, were calculated and module eigengene distance threshold of 0.25 was used to  
793 merge highly similar modules. Top 10 hub genes in each module were identified based on  
794 module membership. These co-expression modules were assessed to determine their  
795 correlation with expression patterns distinct to conditions. Interesting modules having significant  
796 relationships with conditions, such as sex, were visualized using the igraph (v1.2.5)<sup>85</sup> and  
797 ggnetwork (v0.5.8)<sup>86</sup> R packages and in order to focus on the relevant gene pair relationships,

798 network depictions were limited to an adjacency threshold of 0.2 and the top 3000

799 edges/interactions between nodes/gene models.

800

801 *GO and KEGG pathway enrichment analysis:* Gene Ontology (GO) enrichment analysis was

802 carried out using topGO, an R Bioconductor package (v2.38.1)<sup>87</sup> with Fisher's exact test; only

803 GO terms with a  $P < 0.05$  were considered significant. To identify redundant GO terms, semantic

804 similarity among GO terms were measured using Wang's method implemented in the

805 GOSemSim, an R package (v2.12.1)<sup>88</sup>. KEGG<sup>89</sup> pathway enrichment analysis was performed

806 based on hypergeometric distribution test and pathways with  $P < 0.05$  were considered

807 enriched.

808

809 **Phylogenomic analyses of moss and liverwort sex chromosomes.** The genome and

810 transcriptome lines used for phylogenomic analyses can be found in Supplementary Table

811 16<sup>11,12,17,50,90-93</sup>. For all RNA seq data, we filtered for quality using Trimmomatic (v0.36)<sup>78</sup> using

812 leading and trailing values of 3, a window size of 10, a quality score of 30, and a minimum

813 length of 40. We assessed the quality of the remaining reads using fastqc (v0.11.4) (Andrews,

814 2010). To *de novo* assemble genes, we used Trinity (vr20170205-2.4.0)<sup>94</sup> following default

815 parameters (the exception being with *C. purpureus*, for which used `-SS_lib_type RF`). We next

816 determined the single best open reading frame using TransDecoder (v5.0.2)<sup>95</sup>. Our reading

817 frames were checked first against pFam (v32.0)<sup>96</sup> and if no hit was found the frame was

818 determined by Transdecoder. To reduce protein redundancy, we next ran our open reading

819 frames through CD-HIT (4.6.3)<sup>97,98</sup> using a 0.99 threshold.

820 We first found orthogroups for the in-frame genes using Orthofinder (v2.2.0)<sup>99,100</sup>. We

821 built gene trees for genes annotated on the *M. polymorpha* and *C. purpureus* sex chromosomes

822 by first filtering clusters for at least eight species present in the tree (orthogroup\_filter.pl,

823 <https://doi.org/10.5061/dryad.v41ns1rsm>). For these clusters, we wrote FASTA files for both



824 amino acid and cds files of genes clustered within an orthogroup (fasta\_from\_OrthoFinder.pl,  
825 <https://doi.org/10.5061/dryad.v41ns1rsm>). We next aligned our amino acid fasta files using  
826 MAFFT (v7.407)<sup>101</sup>. We back translated our alignments to DNA using pal2nal (v14)<sup>102</sup>.  
827 Alignments were filtered for column occupancy of 0.5 using trimal (v1.2)<sup>103</sup> and filtered to  
828 remove any sequences less than 300bp (alignment\_length\_filter.pl,  
829 <https://doi.org/10.5061/dryad.v41ns1rsm>). These final alignments were used to build  
830 bootstrapped trees using RAxML (v8.2.8)<sup>104</sup> using the GTRGAMMA model and 100 bootstrap  
831 replicates. We visually analyzed trees to determine when genes became sex-linked. To  
832 accomplish this, we identified the clades which contained annotated U and V-linked genes and  
833 determined the most-distantly related species found in the same clade (e.g., Extended Data Fig.  
834 2). All trees and alignments can be found on Dryad under  
835 <https://doi.org/10.5061/dryad.v41ns1rsm>. All tree plots were made using ggtree (v1.14.6)<sup>105,106</sup> in  
836 R (v3.5.3)<sup>72</sup> and edited in Inkscape (v0.92.2) (<https://inkscape.org/en/>)  
837 (ceratodon\_genome\_plots.R, <https://doi.org/10.5061/dryad.v41ns1rsm>).

838 To identify the Ancestral Element from which sex-linked genes descended, trees with  
839 one-to-one U-V orthologs were rooted using *Azolla*, *Salvinia*, *Selaginella*, *Takakia*, or  
840 *Sphagnum* as an outgroup (in this order of preference) using newick utils (v1.6)<sup>107</sup> and only the  
841 longest isoform within a clade for the same sample was retained (edlwtr2.pl,  
842 <https://doi.org/10.5061/dryad.v41ns1rsm>). To determine the closest *P. patens* gene, we used a  
843 custom python script (physco\_outgroup.py, <https://doi.org/10.5061/dryad.v41ns1rsm>), which  
844 used ETE3<sup>108</sup> to first identify the sex-linked genes then finding the closest *P. patens* gene  
845 based on branch length. For these genes, we also determined if a paralogous *C. purpureus*  
846 chromosome 5 paralog was present and reported only those that clearly showed gene  
847 duplication, presumably from the whole-genome duplication event.

848

849 **Protein evolution.** To examine protein evolution of sex-linked and autosomal genes, we first  
850 pruned the trees described above at the closest *P. patens* homolog (prune\_tree.py,  
851 <https://doi.org/10.5061/dryad.v41ns1rsm>)<sup>108</sup>. For genes that had a *C. purpureus* chromosome 5  
852 homolog, the R40 and GG1 leaves were identified instead and pruned at the closest homolog in  
853 *P. patens*. The chromosome 5 homologs were used to assess dN/dS on autosomal genes in *C.*  
854 *purpureus* and were specifically targeted given the recent fusion of the chromosome 5  
855 homeolog to the sex chromosomes. All other copies of a *C. purpureus* gene were removed and  
856 which copy of a gene to keep for all other species was chosen at random. To get dN/dS ratios  
857 we used PAML (v4.9a<sup>61</sup>; additional scripts for this analysis in  
858 <https://doi.org/10.5061/dryad.v41ns1rsm>). For the sex-linked gene trees, we allowed the U and  
859 V to evolve at different rates than the rest of the tree. For the chromosome 5 homologs, the  
860 GG1 and R40 branches could evolve at a different rate than the rest of the tree. dN/dS values >  
861 5 were removed from further analyses. To determine if there is a significant difference in dN/dS  
862 on autosomal, U, and V-linked genes we ran a pairwise Mann-Whitney U test with a Benjamini  
863 and Hochberg correction for multiple tests<sup>74,75</sup> ( $n_{\text{auto}}=61$ ,  $n_U=314$ ,  $n_V=315$ ).

864  
865 **Ka Ks analysis.** FASTA files of in-frame *C. purpureus* and *M. polymorpha* sex-linked genes  
866 were aligned (see above) and converted to axt format (array\_hash\_extractor\_fasta\_unlock\_ks.pl  
867 and aln\_to\_axt.pl, <https://doi.org/10.5061/dryad.v41ns1rsm>). *Ka*, *Ks*, and *Ka/Ks* were calculated  
868 using KaKs Calculator (v2.0)<sup>109</sup> using the Goldman and Yang model<sup>62</sup> on only one-to-one UV  
869 orthologs. *Ks* was plotted on the U and V sex chromosomes (Fig. 3) in R (v3.5.3)<sup>72</sup> using  
870 karyoploteR (v1.8.8)<sup>73</sup> and edited in Inkscape (v0.92.2) (<https://inkscape.org/en/>). One gene with  
871 *Ks* >3 but coalescence in *C. purpureus* was removed from the plot (ceratodon\_genome\_plots.R,  
872 <https://doi.org/10.5061/dryad.v41ns1rsm>).

873

874 **Codon analyses.** To analyze codon-usage biases we used CodonW (v1.4.2; J. Penden  
875 <https://sourceforge.net/projects/codonw>). We first removed any gene that had no expression to  
876 remove potential pseudogenes (gene expression methods below). We also removed genes with  
877 less than 200 codons to reduce the variance around calculated codon values using a custom  
878 PERL script (`alignment_length_filter.pl`, <https://doi.org/10.5061/dryad.v41ns1rsm><sup>110</sup>). We ran a  
879 correspondence analysis on autosomes, U, and V-linked genes together to determine the  
880 optimal codons in *C. purpureus*. We next determined the frequency of optimal codon usage  
881 ( $fop$ <sup>111</sup>), effective number of codons (ENC), and GC content of the third synonymous position of  
882 a codon (GC3s) on autosomes, U, and V-linked genes separately. To determine if there is a  
883 significant difference between  $fop$ , ENC, and GC3s between autosomes, U, and V we ran a  
884 pairwise Mann-Whitney U test with a Benjamini and Hochberg correction for multiple tests<sup>74,75</sup> in  
885 R (v3.5.3<sup>112</sup>) ( $n_{Auto}=15,677$ ,  $n_U=797$ ,  $n_V=736$ ) and plotted the results (Fig. 2) using ggplot2  
886 (v3.2.1<sup>113</sup>) using default box-plot elements (`ceratodon_genome_plots.R`,  
887 <https://doi.org/10.5061/dryad.v41ns1rsm>).

888

889 **Extended Data**

890

891

892

893

894

895

896

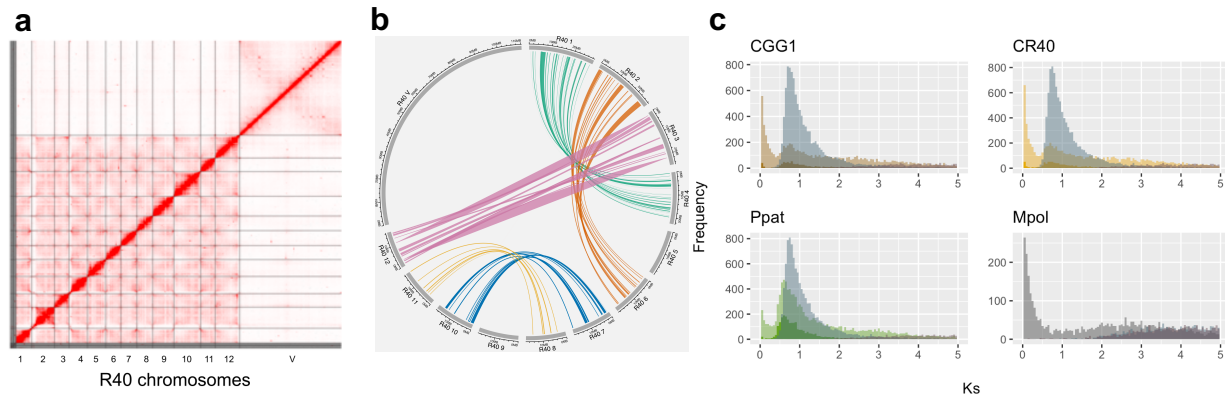

897 **Extended Data Fig. 1. The *C. purpureus* genome assembly and whole-genome**

898 **duplication analyses. a**, Hi-C contact map for the *C. purpureus* R40 isolate, highlighting the

899 chromosome-scale genome assembly. **b**, Collinear regions identified in R40, highlighting the

900 homeologous chromosomes from a whole-genome duplication; syntenic plots in GG1 show the

901 same patterns (data not shown). **c**, *Ks* plots for *C. purpureus* GG1 and R40, *P. patens*, and *M.*

902 *polymorpha*. Node-averaged *Ks* values are shown for all paralogs (in the lighter color) as well as

903 syntenic paralogs (the darker color). The third, blue-grey distribution are orthologs between *C.*

904 *purpureus* and *P. patens*. The *M. polymorpha* *Ks* plot has no syntenic paralogs and shows *M.*

905 *polymorpha* – *C. purpureus* orthologs in blue-grey as well *M. polymorpha* – *P. patens* orthologs

906 in purple, which overlap and become indistinguishable.

907  
908  
909  
910  
911  
912  
913  
914  
915  
916  
917  
918  
919  
920

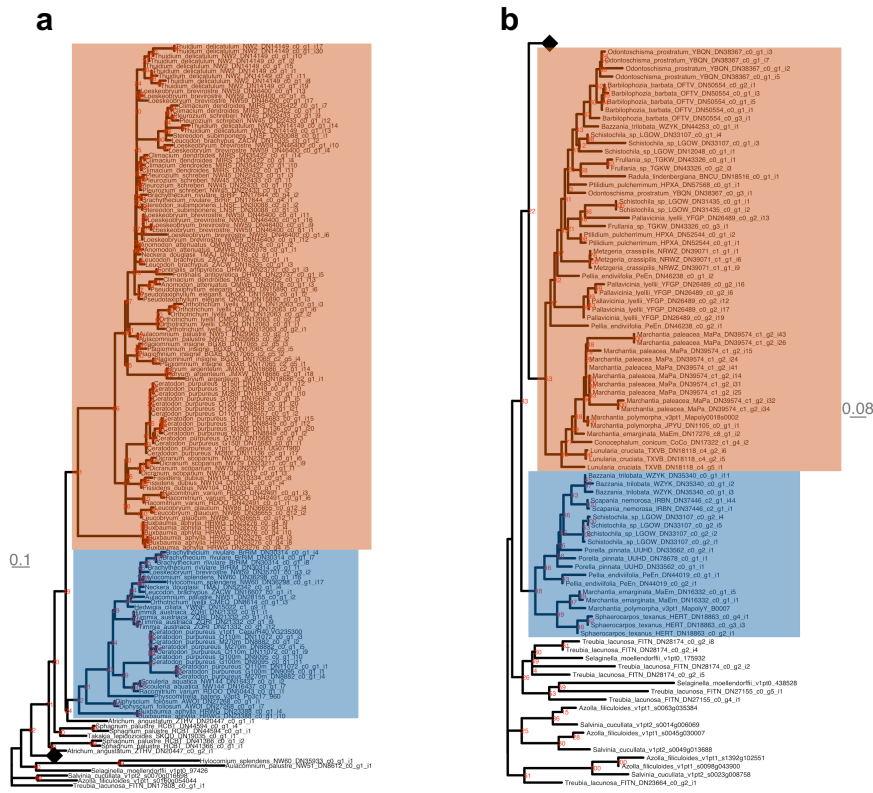

921 **Extended Data Fig. 2. Phylogeny of oldest sex-linked gene identified in mosses and**  
 922 **liverworts.** Trees were built using Maximum-likelihood and bootstrap support is shown in red.  
 923 Trees were rooted using ferns (*Azolla* or *Salvinia*) as the outgroup. Black diamonds represent  
 924 collapsed clades and the branch-length scale is in gray. The clades highlighted in blue are V-  
 925 linked (male), orange are U-linked (female). **a**, Ancient sex-linked gene in mosses. The tree  
 926 includes sex-specific data for *C. purpureus* and distantly-related *Brachythecium rivulare*.  
 927 Evidence for the ancient sex-linkage includes isolates of the same sex being more closely  
 928 related than the other sex of the same species (e.g., *C. purpureus* GG1 is more closely related  
 929 to BrRiF and R40 more-closely related to BrRiM). **b**, One of the oldest sex-linked genes in  
 930 liverworts. Eight other trees in liverworts show a similar topology (see Supplementary Table 8).

931

932

933

934

935

936

937

938

939

940

941

942

943

944

945

946

947

948

949

950

951

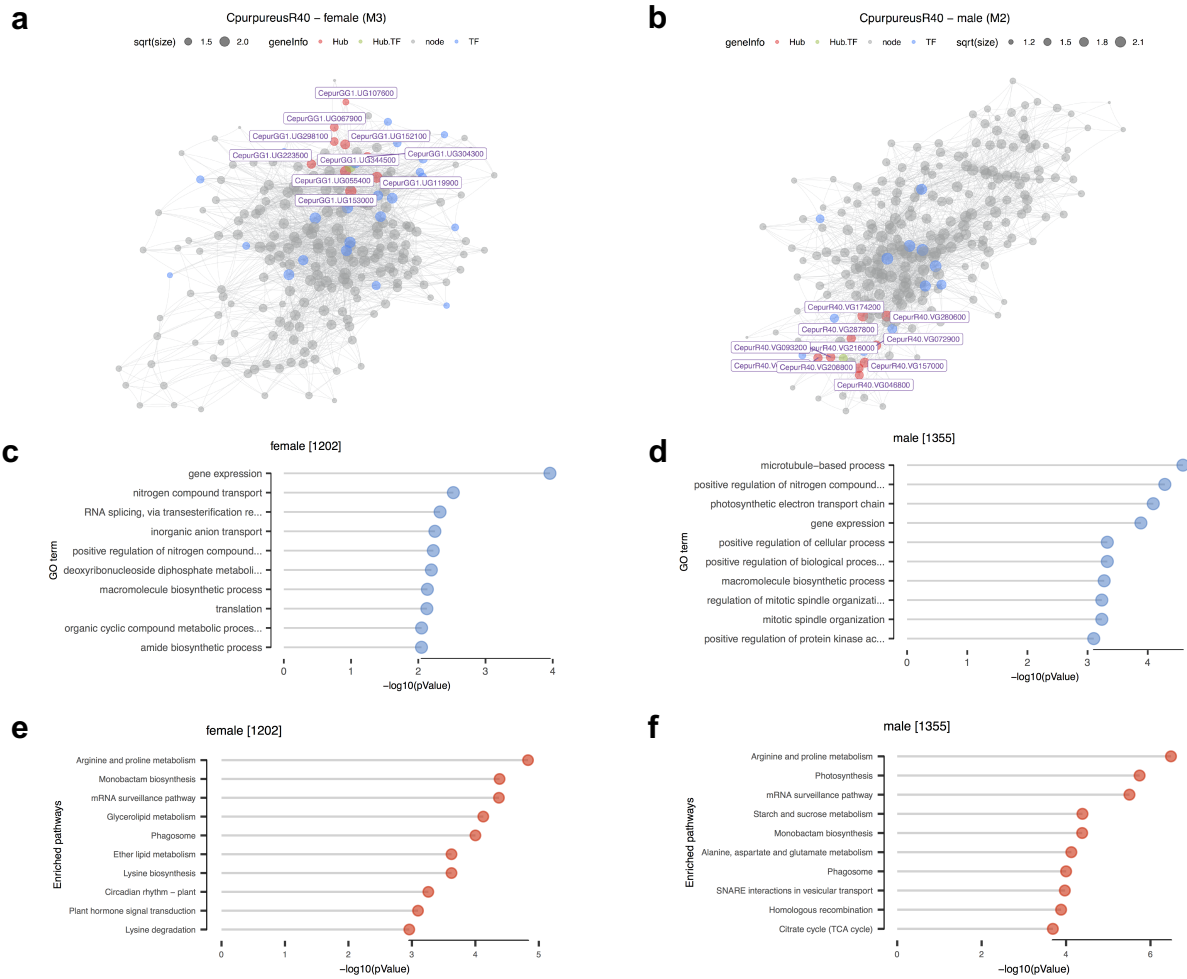

**Extended Data Fig. 3. Co-expression, GO, and KEGG enrichments for female and male**

**modules. a**, Co-expression modules for females. **b**, Co-expression modules for males. **c**,

female module GO enrichment. **d**, male module GO enrichment. **e**, female module KEGG

enrichment. **f**, male module KEGG enrichment. HUBs for each module are identified in red and

with the gene name shown. Transcription factors (TF) are in blue and nodes in gray.

952  
953  
954  
955  
956  
957  
958  
959  
960  
961  
962  
963  
964  
965  
966

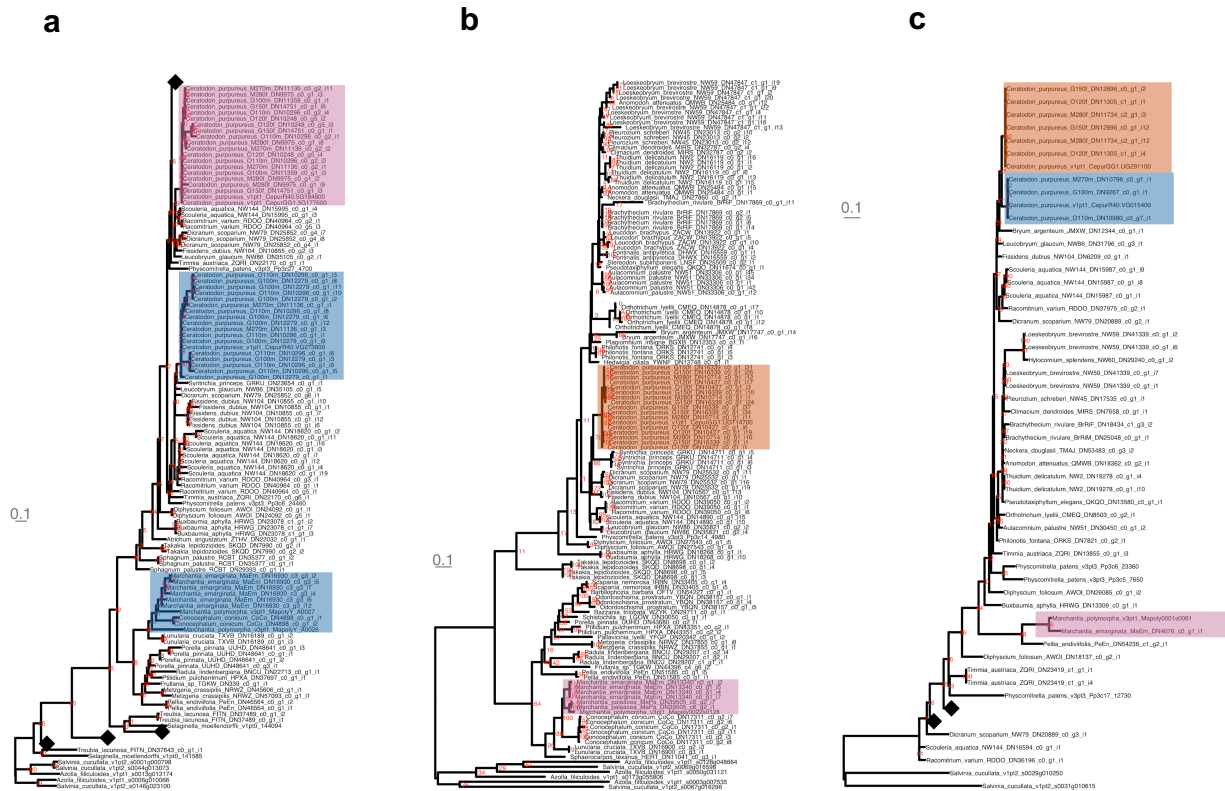

967 **Extended Data Fig. 4. Notable homologous genes in *C. purpureus* and *M. polymorpha*.**  
 968 Trees were built using Maximum-likelihood and bootstrap support is shown in red. Trees were  
 969 rooted using ferns (*Azolla* or *Salvinia*) as the outgroup. Black diamonds represent collapsed  
 970 clades and the branch-length scale is in gray. The clades highlighted in blue are V-linked  
 971 (male), orange are U-linked (female) and purple are noteworthy autosomal homologs. **a**, An  
 972 *ABC1* gene that is sex-linked in males of *C. purpureus* and *M. polymorpha*. The topology  
 973 suggests this gene was independently captured between the two lineages. **b**, An *RWP-RK* gene  
 974 that is sex-linked in females of *C. purpureus* and orthologous to *Marchantia MpRKD*. **c**, Gene  
 975 tree of sex-linked genes in *C. purpureus* showing they are orthologous to *Marchantia*  
 976 *MpFGMYB*.

977

978 **Extended Data Table 1. Sex-biased gene expression patterns in *C. purpureus* for**

979 **protonemal and gametophore stages.** Autosomal genes presented are significantly

980 differentially expressed at an adjusted  $P \leq 0.05$ . U and V-linked genes given are sex-specific (i.e.,

981 no evidence of a paralog on the other sex chromosome). Many homologous sex-linked genes

982 are also expressed, however, it is not possible to statistically test for differences in expression

983 between these because they are mapped to different chromosomes.

|                  | Protonema   |                          | Gametophore |                          |
|------------------|-------------|--------------------------|-------------|--------------------------|
|                  | MC $\geq$ 1 | FC $\geq$ 2; MC $\geq$ 1 | MC $\geq$ 1 | FC $\geq$ 2; MC $\geq$ 1 |
| Male autosomal   | 2048        | 317                      | 1307        | 256                      |
| Female autosomal | 1900        | 366                      | 1420        | 264                      |
| U                | 1006        | -                        | 1061        | -                        |
| V                | 978         | -                        | 1054        | -                        |

984 Mean count (MC)

985 Fold change (FC)

986
